# Supplementary material for: Socio-demographic characteristics of women sustaining injuries during pregnancy: a study from the Danish National Birth Cohort
Source: PubMed Central journal article supplement — BMJ Open. 2012 Jul 2;2(4):e000826. doi: 10.1136/bmjopen-2012-000826 (PMC3391365; doi:10.1136/bmjopen-2012-000826), 2012-07-02
Supplement: bmjopen-2012-000826.draft_revisions.pdf [file bmjopen-2012-000826.draft_revisions.pdf]

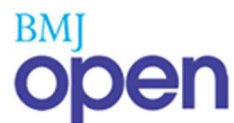

**Socio-demographic characteristics of women sustaining injuries during pregnancy,  
A Study from the Danish National Birth Cohort**

|                                 |                                                                                                                                                                                                                |
|---------------------------------|----------------------------------------------------------------------------------------------------------------------------------------------------------------------------------------------------------------|
| Journal:                        | <i>BMJ Open</i>                                                                                                                                                                                                |
| Manuscript ID:                  | bmjopen-2012-000826                                                                                                                                                                                            |
| Article Type:                   | Research                                                                                                                                                                                                       |
| Date Submitted by the Author:   | 09-Jan-2012                                                                                                                                                                                                    |
| Complete List of Authors:       | Virk, Jasveer; University of California at Los Angeles, Epidemiology<br>Olsen, Jorn; University of California at Los Angeles, Epidemiology<br>Hsu, Paul; University of California at Los Angeles, Epidemiology |
| <b>Primary Subject Heading</b>: | Epidemiology                                                                                                                                                                                                   |
| Secondary Subject Heading:      | Public health                                                                                                                                                                                                  |
| Keywords:                       | EPIDEMIOLGY, Prenatal diagnosis < OBSTETRICS, PUBLIC HEALTH                                                                                                                                                    |
|                                 |                                                                                                                                                                                                                |

SCHOLARONE™  
Manuscripts

## TITLE PAGE

**Socio-demographic characteristics of women sustaining injuries during pregnancy,  
A Study from the Danish National Birth Cohort****Corresponding author:**

Jasveer Virk, M.P.H, PhD

Southern California Injury Prevention Research Center  
University of California Los Angeles (UCLA)  
Department of Epidemiology  
71-264 CHS  
Los Angeles, 90095-1772  
Phone: 310-825-3516  
Fax: 310-206-6039  
jasvirk@ucla.edu

**Co-authors:**

Paul Hsu, PhD

Southern California Injury Prevention Research Center  
Los Angeles  
  
University of California Los Angeles (UCLA)  
Department of Epidemiology  
Los Angeles

Jorn Olsen, M.D., PhD

University of California Los Angeles (UCLA)  
Department of Epidemiology  
71-264 CHS  
Los Angeles, 90095-1772

**Key words:** Cohort study, Descriptive study, Pregnancy, Birth outcomes

**Word count:** 1306

## Article summary

### Article Focus

- We describe adverse birth outcomes associated with injuries that took place among pregnant women in the Danish National Birth Cohort and include in our assessment injury severity, cause, and mechanism.

### Key Messages

- Pregnant women were slightly more likely to deliver stillbirth, preterm and have low birth weight, but not more likely to be SGA; and none of these differences reached statistical significance.
- Place of treatment was not adversely related to SGA, low birth weight, or preterm birth.
- Women sustaining head injuries were significantly more likely to have a stillbirth (HR:3.86, CL:1.23, 12.06).

### Strengths and Limitations

- Many previous studies have selected pregnant trauma patients or emergency room patients, our study however presents injuries among pregnant women from a general population.
- We only have data on late spontaneous abortions, and if injured fetuses are aborted early we wouldn't detect an association.

## Abstract

**Objective:** To describe adverse birth outcomes associated with hospital treated injuries that took place among women in the Danish National Birth Cohort (DNBC); and include in our assessment injury severity, cause, and mechanism.

**Design, Setting & Participants:** We utilized data from the DNBC, a longitudinal population based cohort of pregnant women and their offspring established during 1996–2002. Information was collected twice during pregnancy, at gestational age 12 and 30 weeks; and again when the children reached 6 and 18 months of age. To obtain information regarding birth outcomes, data for each woman were linked to the Danish National Birth Registry and the Danish National Patient Registry. Women were excluded for pre-eclampsia/eclampsia or diabetes (n=9,316) leaving 80,874 women for the analysis.

**Primary and Secondary Outcome Measures:** To determine if injured women were more likely to deliver preterm, low birth weight or stillbirth we estimated hazard ratios. Odds ratios were generated to assess Apgar scores <10. Models were adjusted for maternal smoking and drinking during pregnancy, household socioeconomic status, and maternal age at birth. Severity of injuries sustained was assessed by stratifying by place of treatment (admittance to emergency department versus other department).

**Results:** In our cohort of 80,874 pregnant women, 2,604 (3.2%) received medical treatment for an injury during their pregnancy. Injured pregnant women were slightly more likely to deliver stillbirth, preterm and have low birth weight, but not more likely to be SGA, and none of these differences reached statistical significance. However, women sustaining head injuries were significantly more likely to have a stillbirth (HR:3.86, CL:1.23, 12.06).

**Conclusion:** Our study shows that injuries occurring among moderately affluent women from an unselected population may cause no immediate adverse health effects to the unborn child, except for the case of stillbirth among women with head or neck injuries.

## Introduction

During pregnancy, up to 7 percent of women sustain unintentional injuries [1]; and traumatic injuries are a major cause of maternal and neonatal morbidity and mortality [2,3] with widespread occurrences throughout the world. Less is known about less severe injuries occurring in an unselected population. We also know little about the context in which these injuries take place, and the socio demographic characteristics of women sustaining these injuries. We also have limited data on long term consequences of these injuries for the offspring. In this paper, we describe adverse birth outcomes associated with hospital treated injuries that took place among women in the Danish National Birth Cohort (DNBC); we include in our assessment injury severity, cause, and mechanism.

## Methods

We utilized data collected from the Danish National Birth Cohort (DNBC), which is a longitudinal population based cohort of pregnant women and their offspring established during 1996–2002. Women were contacted to take part in the study by physicians providing their primary care during pregnancy. Approximately half of all general practitioners in Denmark participated in the study; and approximately 60% of women who were invited participated. Additional information on study design and data collection methods for the DNBC are described elsewhere [4]. Information was collected twice during pregnancy using computer assisted telephone interviews, at gestational age 12 and 30 weeks; and again when the children reached 6 and 18 months of age. All Regional Ethics Committee in Denmark approved the establishment of the cohort and this study was further approved by the Danish Data Protection Agency and UCLA Office for Protection of Research Subjects.

To obtain information regarding birth outcomes, data for each woman were linked through her personal civil registration number to the Danish National Birth Registry and the Danish National Patient Registry for the entire pregnancy period. The Danish National Birth Registry has collected data since 1968 for the primary purpose of monitoring the health of newborns and the quality of antenatal care, and has been

1  
2  
3 increasingly used for research [5]. The gestational age at birth and birth weight was obtained from the  
4 Birth Register. Small for gestational age (SGA) was defined as a weight below the 10<sup>th</sup> percentile for  
5 gestational age, grouped by week, among children born in the DNBC.  
6  
7  
8

9  
10 Information regarding injuries sustained during pregnancy was obtained from the Danish National Patient  
11 Registry, which contains data on all hospital stays and outpatient visits for the duration of each woman's  
12 pregnancy. For each admission or visit, the patient registry collects information on the primary discharge  
13 diagnosis (the discharge diagnosis that best describes the condition leading to the admission or outpatient  
14 visit and that is the primary reason for the prescribed and completed course of tests and treatments) and up  
15 to 20 subsidiary diagnoses. It also collects information on external cause of injury, including the mode,  
16 location, and mechanism causing the injury. Data were extracted with the use of *International*  
17 *Classification of Diseases, 10th Revision* (ICD Website, 2007) [6] and the second edition of the Nordic  
18 Medico-Statistical Committee's (NOMESCO) Classification of External Causes of Injuries (NCECI) [7].  
19  
20  
21  
22  
23  
24  
25  
26  
27  
28  
29  
30

31  
32 We identified 90,190 women who were still pregnant at the time of the first interview. Since pre-  
33 eclampsia/eclampsia or diabetes of any type (n=9,316) may influence pregnancy outcomes we excluded  
34 these pregnancies from the analysis; leaving 80,874 women for the analysis. All injuries were classified  
35 by the body location and mechanism causing the injury; transportation injuries were further described by  
36 mode of transportation. Women were categorized as injured if they sustained an injury at any point during  
37 pregnancy, regardless of mode, body region, and mechanism causing the injury; and uninjured otherwise.  
38  
39  
40  
41  
42  
43  
44  
45  
46  
47

48 To determine if injured women were more likely to deliver preterm (<30 weeks, 30-37 weeks, > 37  
49 weeks), low birth weight (<1500 grams, 1500-2500 grams, >2500 grams), or stillbirth we estimated  
50 hazard ratios (HRs) using PROC PHREG in SAS Statistical Software. These models were adjusted for  
51 maternal smoking and drinking during pregnancy, household socioeconomic status, and maternal age at  
52 birth. To determine if injured women were more likely to deliver SGA infants or infants with an APGAR  
53  
54  
55  
56  
57  
58  
59  
60

1  
2  
3 score <10, we generated odds ratios (ORs) using PROC GENMOD in SAS statistical software. To assess  
4 severity of injuries sustained, we stratified by place of treatment (admittance to emergency department  
5 versus other department).  
6  
7  
8  
9

## 10 11 **Results**

12 In our cohort of 80,874 pregnant women, 2,604 (3.2%) received medical treatment for an injury during  
13 their pregnancy. Socio demographic characteristics of all women in the cohort are presented in table 1.  
14 Results have been stratified by presence/absence of injury. Injured women were younger, smoked  
15 cigarettes more often and had lower household socioeconomic status. Injury characteristics such as mode  
16 of injury, activity engaged in while sustaining injury, mechanism causing injury and body region of injury  
17 are presented in table 2. Approximately one third of the injuries were due to falls and took place during a  
18 leisure activity. Less than one fifth of the injuries were related to transportation. We found that injured  
19 pregnant women were slightly more likely to deliver stillbirth, preterm and have low birth weight, but not  
20 more likely to be SGA; and none of these differences reached statistical significance. To assess severity  
21 of injury we stratified injuries by admittance to the emergency department, and women who sustained  
22 head or neck injuries. Place of treatment was not adversely related to SGA, low birth weight, or preterm  
23 birth. However, women sustaining head injuries were significantly more likely to have a stillbirth  
24 (HR:3.86, CL:1.23, 12.06).  
25  
26  
27  
28  
29  
30  
31  
32  
33  
34  
35  
36  
37  
38  
39  
40  
41  
42

## 43 **Discussion**

44 Our study shows that most injuries occurring in an unselected affluent Danish population cause no  
45 immediate adverse health effects to the unborn child except for stillbirth, which may be increased among  
46 women with head or neck injuries. Adverse pregnancy outcomes resulting from maternal injury have been  
47 documented in other studies [8-23]. Severely injured pregnant women are more likely to have preterm  
48 labor, placental abruption, cesarean-section, uterine rupture, low birth-weight, and their infants are more  
49  
50  
51  
52  
53  
54  
55  
56  
57  
58  
59  
60

1  
2  
3 likely to result in pre-term delivery and suffer from fetal distress, asphyxia, respiratory distress syndrome  
4 and circum to fetal, neonatal and infant death compared to their uninjured counterparts [13].  
5  
6  
7

8  
9  
10 Unlike many previous studies that have selected pregnant trauma patients or emergency room patients,  
11 our study presents injuries among pregnant women from a general population. Our data shows that  
12 injured women were slightly younger than their non-injured counterparts. Trends in household socio-  
13 economic status also seemed to differ slightly; there were fewer injured women with higher-grade  
14 professional household status and more injured women with unskilled work status, compared to their non-  
15 injured counterparts. Injured women were also slightly more likely to smoke cigarettes and consume  
16 three or more alcoholic drinks per week. The high prevalence of binge drinking in the DNBC occurred  
17 often at very early stage of pregnancy, when pregnancy status may be uncertain or unknown to the  
18 mother. Nine out of ten traumatic injuries during pregnancy are minor; however, 60-70% of fetal losses  
19 during pregnancy have been reported as a result of minor injuries [16]. In this study we only have data on  
20 late spontaneous abortions, and if injured fetuses are aborted early it may explain why we detect limited  
21 associations among newborns. Other authors have found adverse maternal, neonatal, and infant outcomes  
22 associated with maternal injury [2,3].  
23  
24  
25  
26  
27  
28  
29  
30  
31  
32  
33  
34  
35  
36  
37  
38  
39

40 While previous studies on pregnant injured women have focused on maternal, neonatal and infant  
41 outcomes, this study addresses socio-demographic characteristics. Future studies need to focus on long  
42 term infant outcomes, that extend beyond the perinatal period, and consider maternal characteristics that  
43 may influence susceptibility to injury severity and injury proneness. At present these results are  
44 reassuring; even women who are hospitalized for an injury will in only a few cases have an excess risk of  
45 having an abnormal pregnancy outcome.  
46  
47  
48  
49  
50  
51  
52  
53  
54  
55  
56  
57  
58  
59  
60



### Author Contributions

JV, JO, and PH contributed to conception and design of the paper. JO contributed to acquisition of data. JV and PH contributed to analysis of the data. JV, JO and PH contributed to interpretation of data. JV wrote the original paper draft; JO and PH contributed to revisions of the paper. JV, JO and PH approved the final version of the paper to be published.

### Data Sharing Statement

There is no additional data available.

### Funding Statement

This research received no specific grant from any funding agency in the public, commercial or not-for-profit sectors.

### Competing Interests Statement

The authors of this paper declare no competing interests.

**Table 1: Demographic statistics on study population stratified by injury status and department of hospital admittance**

|                                                  | Total cohort   |      |                            |      |                   |      | Place of treatment |      |                     |      |
|--------------------------------------------------|----------------|------|----------------------------|------|-------------------|------|--------------------|------|---------------------|------|
|                                                  | All<br>N=80874 |      | Non-<br>Injured<br>n=78270 |      | Injured<br>n=2604 |      | Other<br>n=78297   |      | Emergency<br>n=2577 |      |
| Characteristics                                  | N              | (%)  | N                          | (%)  | N                 | (%)  | N                  | (%)  | N                   | (%)  |
| <b>Maternal age at delivery</b>                  |                |      |                            |      |                   |      |                    |      |                     |      |
| <25 yr                                           | 7641           | 9.5  | 7243                       | 9.3  | 398               | 15.3 | 7250               | 9.3  | 391                 | 15.2 |
| 25-29 yr                                         | 31011          | 38.3 | 29971                      | 38.3 | 1040              | 39.9 | 29980              | 38.3 | 1031                | 40.0 |
| 30-34 yr                                         | 30279          | 37.4 | 29454                      | 37.6 | 825               | 31.7 | 29462              | 37.6 | 817                 | 31.7 |
| 35-39 yr                                         | 10691          | 13.2 | 10390                      | 13.3 | 301               | 11.6 | 10393              | 13.3 | 298                 | 11.6 |
| ≥40 yr                                           | 1252           | 1.6  | 1212                       | 1.6  | 40                | 1.5  | 1212               | 1.6  | 40                  | 1.6  |
| <b>Gestational age at delivery (weeks)</b>       |                |      |                            |      |                   |      |                    |      |                     |      |
| < 30                                             | 399            | 0.6  | 385                        | 0.3  | 14                | 0.5  | 385                | 0.6  | 14                  | 0.5  |
| 31-36                                            | 2891           | 3.7  | 2779                       | 3.7  | 112               | 4.4  | 2782               | 3.7  | 109                 | 4.4  |
| 37-40                                            | 32953          | 42.2 | 31831                      | 42.1 | 1122              | 44.3 | 31840              | 42.1 | 1113                | 44.4 |
| 41-42                                            | 36966          | 47.3 | 35819                      | 47.4 | 1147              | 45.3 | 35832              | 47.4 | 1134                | 45.3 |
| >42                                              | 4883           | 6.3  | 4746                       | 6.3  | 137               | 5.4  | 4747               | 6.3  | 136                 | 5.4  |
| <b>Birth weight (grams)</b>                      |                |      |                            |      |                   |      |                    |      |                     |      |
| < 1500                                           | 679            | 0.9  | 661                        | 0.9  | 18                | 0.7  | 661                | 0.9  | 18                  | 0.7  |
| 1500-2500                                        | 1703           | 2.2  | 1636                       | 2.2  | 67                | 2.7  | 1636               | 2.2  | 67                  | 2.7  |
| >2500                                            | 75710          | 97.0 | 73263                      | 97.0 | 2447              | 96.6 | 73289              | 97.0 | 2421                | 96.6 |
| <b>Sex of child</b>                              |                |      |                            |      |                   |      |                    |      |                     |      |
| Female                                           | 38130          | 48.8 | 36934                      | 48.8 | 1196              | 47.2 | 36938              | 48.9 | 1192                | 47.6 |
| Male                                             | 39953          | 51.2 | 38617                      | 51.2 | 1336              | 52.8 | 38639              | 51.1 | 1314                | 52.4 |
| <b>Parity</b>                                    |                |      |                            |      |                   |      |                    |      |                     |      |
| 1                                                | 35265          | 46.4 | 34012                      | 46.2 | 1253              | 51.4 | 34027              | 46.2 | 1238                | 51.3 |
| 2                                                | 28471          | 37.4 | 27626                      | 37.5 | 845               | 34.7 | 27631              | 37.5 | 840                 | 34.8 |
| 3+                                               | 12313          | 16.2 | 11972                      | 16.3 | 341               | 14.0 | 11977              | 16.3 | 336                 | 13.9 |
| <b>Smoking status</b>                            |                |      |                            |      |                   |      |                    |      |                     |      |
| None                                             | 59271          | 73.3 | 57534                      | 73.5 | 1737              | 66.7 | 57553              | 73.5 | 1718                | 66.7 |
| Stopped during pregnancy                         | 11788          | 14.6 | 11332                      | 14.5 | 456               | 17.5 | 11336              | 14.5 | 452                 | 17.5 |
| 1-10                                             | 9707           | 12.0 | 9297                       | 11.9 | 410               | 15.8 | 9301               | 11.9 | 406                 | 15.8 |
| ≥10                                              | 108            | 0.1  | 107                        | 0.1  | 1                 | 0.0  | 107                | 0.1  | 1                   | 0.0  |
| <b>Average alcohol consumption (drinks/week)</b> |                |      |                            |      |                   |      |                    |      |                     |      |
| None                                             | 35459          | 43.8 | 34289                      | 43.8 | 1170              | 44.9 | 34303              | 43.8 | 1156                | 44.9 |
| 1                                                | 9636           | 11.9 | 9370                       | 12.0 | 266               | 10.2 | 9372               | 12.0 | 264                 | 10.2 |
| 2                                                | 6393           | 7.9  | 6219                       | 8.0  | 174               | 6.7  | 6219               | 7.9  | 174                 | 6.8  |

|                                        |       |      |       |      |      |      |       |      |      |      |
|----------------------------------------|-------|------|-------|------|------|------|-------|------|------|------|
| 3                                      | 2437  | 3.0  | 2366  | 3.0  | 71   | 2.7  | 2366  | 3.0  | 71   | 2.8  |
| 4+                                     | 2302  | 2.9  | 2239  | 2.9  | 65   | 2.5  | 2238  | 2.9  | 64   | 2.5  |
| ≥5 at one time                         | 24647 | 30.5 | 23789 | 30.4 | 858  | 33.0 | 23799 | 30.4 | 848  | 32.9 |
| <b>Household socio-economic status</b> |       |      |       |      |      |      |       |      |      |      |
| Higher-grade professionals             | 19484 | 24.1 | 18926 | 24.2 | 558  | 21.4 | 18931 | 24.2 | 553  | 21.5 |
| Middle-grade professionals             | 25220 | 31.2 | 24468 | 31.3 | 752  | 28.9 | 24473 | 31.3 | 747  | 29.0 |
| Skilled work                           | 22321 | 27.6 | 21575 | 27.6 | 746  | 28.7 | 21584 | 27.6 | 737  | 28.6 |
| Unskilled work                         | 11109 | 13.7 | 10662 | 13.6 | 447  | 17.2 | 10667 | 13.6 | 442  | 17.2 |
| Student                                | 1933  | 2.4  | 1868  | 2.4  | 65   | 2.5  | 1868  | 2.4  | 65   | 2.5  |
| Unemployed > 1 yr                      | 617   | 0.8  | 587   | 0.8  | 30   | 1.2  | 590   | 0.8  | 27   | 1.1  |
| Unclassified                           | 190   | 0.2  | 184   | 0.2  | 6    | 0.2  | 184   | 0.2  | 6    | 0.2  |
| <b>Partner cohabitation status</b>     |       |      |       |      |      |      |       |      |      |      |
| Cohabits                               | 59831 | 99.0 | 57967 | 99.0 | 1864 | 98.2 | 57986 | 99.0 | 1845 | 98.2 |
| Does not cohabit                       | 618   | 1.0  | 584   | 1.0  | 34   | 1.8  | 584   | 1.0  | 34   | 1.8  |
| <b>Place of delivery</b>               |       |      |       |      |      |      |       |      |      |      |
| Urban*                                 | 42252 | 52.2 | 40912 | 52.3 | 1340 | 51.5 | 40933 | 52.3 | 1319 | 51.2 |
| Rural                                  | 38622 | 47.8 | 37358 | 47.8 | 1264 | 48.5 | 37364 | 47.7 | 1258 | 48.8 |
| <b>Outcome</b>                         |       |      |       |      |      |      |       |      |      |      |
| Low birth weight (<2500 grams)         | 2029  | 2.6  | 1952  | 2.6  | 77   | 3.1  | 1952  | 2.6  | 77   | 3.1  |
| Preterm birth (<37 weeks)              | 3031  | 3.9  | 2915  | 3.9  | 116  | 4.6  | 2917  | 3.9  | 114  | 4.6  |
| Small for gestational age (SGA)        | 7368  | 9.5  | 7118  | 9.4  | 250  | 9.9  | 7120  | 9.4  | 248  | 9.9  |
| Spontaneous abortion                   | 784   | 1.0  | 770   | 98.2 | 14   | 1.8  | 770   | 98.2 | 14   | 1.8  |
| Stillbirth                             | 236   | 0.3  | 225   | 95.3 | 11   | 4.7  | 226   | 95.8 | 10   | 4.2  |

\*Urban residence include Aarhus, Gentofte, Frederiksberg, Odense, Aalborg

\*\*Missing values: gestational age=2782, birthweight=2782, sex of child=2791, parity=4816, cohabit=20417, low birthweight=3279, pre-term birth=3189, SGA=2923

**Table 2: Description of Injuries**

|                                                             |     |
|-------------------------------------------------------------|-----|
| <b><i>Mode of Injury</i></b>                                |     |
| Knock, blow caused by fall on the same level                | 415 |
| Knock, blow caused by fall on stairway/lower level          | 301 |
| Knock, blow due to bodily contact with object/animal/person | 834 |
| Crushing/cut/sting                                          | 537 |
| Foreign object                                              | 99  |
| Chemical influence                                          | 26  |
| Thermal/electrical impact or radiation                      | 49  |
| Acute overload of the whole or part of the body             | 276 |
| Other/unspecified cause of injury                           | 66  |
| <b><i>Activity during injury</i></b>                        |     |
| Sport, exercise                                             | 149 |
| Play, hobby and other leisure activity                      | 751 |
| Work                                                        | 458 |
| Vital activity                                              | 243 |
| Unpaid work                                                 | 123 |
| Other activity/Unspecified                                  | 880 |
| <b><i>Description of transportation injuries</i></b>        |     |
| On foot                                                     | 11  |
| Bicycle                                                     | 119 |
| Moped/Motorbike/scooter                                     | 20  |
| Car                                                         | 313 |
| Delivery van/truck/bus or other                             | 5   |
| Other/Unspecified transportation                            | 10  |

**Table 3: Odds and Hazard Ratios for abnormal birth outcomes following maternal exposure to injuries**

| Outcome                          |             | Non-Injured Women<br>N=80874 | Injured Women<br>N=2604 | Injured women admitted to Emergency Department<br>N=2577 | Women with head and neck injuries<br>N=462 | Women with head injuries<br>N=312 |
|----------------------------------|-------------|------------------------------|-------------------------|----------------------------------------------------------|--------------------------------------------|-----------------------------------|
| <b>Small for gestational age</b> |             | reference                    | 0.98 (0.86, 1.12)       | 0.98 (0.85, 1.12)                                        | 1.15 (0.85, 1.54)                          | 1.30 (0.92, 1.84)                 |
| <b>APGAR Score &lt;10</b>        |             | reference                    | 1.08 (0.93, 1.25)       | 1.09 (0.94, 1.26)                                        | 1.01 (0.70, 1.44)                          | 1.04 (0.68, 1.60)                 |
| <b>Stillbirth</b>                |             | reference                    | 1.71 (0.93, 3.13)       | 1.57 (0.83, 3.00)                                        | 2.61 (0.83,8.15)                           | 3.86 (1.23, 12.06)                |
| <b>Low birth weight (grams)</b>  | <1500       | -                            | 0.90 (0.49, 1.63)       | 0.91 (0.50, 1.66)                                        | 0.90 (0.22, 3.62)                          | 0.67 (0.09, 4.76)                 |
|                                  | 1500-2500   | -                            | 1.17 (0.91, 1.51)       | 1.19 (0.92, 1.52)                                        | 1.26 (0.72, 2.19)                          | 1.30 (0.67, 2.54)                 |
|                                  | >2500       | -                            | reference               | reference                                                | reference                                  | reference                         |
| <b>Preterm birth</b>             | <30 weeks   | -                            | 0.92 (0.41, 2.07)       | 0.93 (0.41, 2.09)                                        | 0.87 (0.41, 2.09)                          | 1.29 (0.18, 9.22)                 |
|                                  | 30-37 weeks | -                            | 1.18 (0.98, 1.43)       | 1.18 (0.98, 1.43)                                        | 1.45 (0.97, 2.17)                          | 1.53 (0.95, 2.47)                 |
|                                  | >37 weeks   | -                            | reference               | reference                                                | reference                                  | reference                         |

## REFERENCES:

1. Chames MC, Pearlman MD. Trauma during pregnancy: outcomes and clinical management. *Clin Obstet Gynecol.* 2008;51(2):398-408.
2. Oxford CM, Ludmir J. Trauma in pregnancy. *Clin Obstet Gynecol.* 2009;52(4):611-29.
3. Mirza FG, Devine PC, Gaddipati S. Trauma in pregnancy: a systematic approach. *Am J Perinatol.* 2010;27(7):579-86.
4. Olsen J, Melbye M, Olsen SF, Sorensen TIA, Aaby P, et. Al. The Danish National Birth Cohort – its background, structure and aim. *Scand J Public Health.* 2001;29:300-307.
5. Virk J, Zhang J, Olsen J. Medical abortion and the risk of subsequent pregnancy outcomes. *N Engl J Med.* 2007;357(7):648-53.
6. International Classification of Diseases (ICD) online. Geneva: World Health Organization. (Accessed July 20, 2007, at <http://www.who.int/classifications/icd/en/>.)
7. Nordic Medico-Statistical Committee's (NOMESCO) Classification of External Causes of Injuries (NCECI).
8. Schiff MA, Holt VL, Daling JR. Maternal and infant outcomes after injury during pregnancy in Washington State from 1989 to 1997. *J Trauma.* 2002;53(5):939-45.
9. Ikossi DG, Lazar AA, Morabito D, et al. Profile of mothers at risk: an analysis of injury and pregnancy loss in 1,195 trauma patients. *J Am Coll Surg.* 2005;200(1):49-56. Erratum in: *J Am Coll Surg.* 2005;200(3):482.
10. Weiss HB, Lawrence B, Miller T. Prevalence and risk of hospitalized pregnant occupants in car crashes. *Annu Proc Assoc Adv Automot Med.* 2002;46:355-66.
11. Weiss HB, Strotmeyer S. Characteristics of pregnant women in motor vehicle crashes. *Inj Prev.* 2002;8(3):207-10.
12. Schiff MA, Holt VL. Pregnancy outcomes following hospitalization for motor vehicle crashes in Washington State from 1989 to 2001. *Am J Epidemiol.* 2005;161(6):503-10.

13. El-Kady D, Gilbert WM, Anderson J, et al. Trauma during pregnancy: an analysis of maternal and fetal outcomes in a large population. *Am J Obstet Gynecol.* 2004;190(6):1661-8.
14. Hitosugi M, Motozawa Y, Kido M, et al. Traffic injuries of the pregnant women and fetal or neonatal outcomes. *Forensic Sci Int.* 2006;159(1):51-4.
15. Hyde LK, Cook LJ, Olson LM, et al. Effect of motor vehicle crashes on adverse fetal outcomes. *Obstet Gynecol.* 2003;102(2):279-86.
16. El Kady. Perinatal outcomes of traumatic injuries during pregnancy. *Clin Obstet Gynecol.* 2007;50(3):582-91.
17. El Kady D, Gilbert WM, Xing G, et al. Maternal and neonatal outcomes of assaults during pregnancy. *Obstet Gynecol.* 2005;105(2):357-63.
18. El Kady D, Gilbert WM, Xing G, et al. Association of maternal fractures with adverse perinatal outcomes. *Am J Obstet Gynecol.* 2006;195(3):711-6.
19. Gandhi SG, Gilbert WM, McElvy SS, et al. Maternal and neonatal outcomes after attempted suicide. *Obstet Gynecol.* 2006;107(5):984-90.
20. Lipsky S, Holt VL, Easterling TR, et al. Police-reported intimate partner violence during pregnancy and the risk of antenatal hospitalization. *Matern Child Health J.* 2004;8(2):55-63.
21. Patterson RM. Trauma in pregnancy. *Clin Obstet Gynecol.* 1984;27:32-38.
22. Shah KH, Simons RK, Holbrook T, et al. Trauma in pregnancy: maternal and fetal outcomes. *J Trauma.* 1998;45(1):83-6.
23. Weiss HB, Songer TJ, Fabio A. Fetal deaths related to maternal injury. *JAMA.* 2001;286(15):1863-8.
24. Mattox KL, Goetzl L. Trauma in Pregnancy. *Crit Care Med.* 2005;33(10):S385-9.

STROBE Statement—Checklist of items that should be included in reports of *cohort studies*

|                              | Item No | Recommendation                                                                                                                                                                                                                                                                                                                                                                                                |
|------------------------------|---------|---------------------------------------------------------------------------------------------------------------------------------------------------------------------------------------------------------------------------------------------------------------------------------------------------------------------------------------------------------------------------------------------------------------|
| <b>Title and abstract</b>    | 1       | (a) Indicate the study's design with a commonly used term in the title or the abstract<br>(b) Provide in the abstract an informative and balanced summary of what was done and what was found                                                                                                                                                                                                                 |
| <b>Introduction</b>          |         |                                                                                                                                                                                                                                                                                                                                                                                                               |
| Background/rationale         | 2       | Explain the scientific background and rationale for the investigation being reported                                                                                                                                                                                                                                                                                                                          |
| Objectives                   | 3       | State specific objectives, including any prespecified hypotheses                                                                                                                                                                                                                                                                                                                                              |
| <b>Methods</b>               |         |                                                                                                                                                                                                                                                                                                                                                                                                               |
| Study design                 | 4       | Present key elements of study design early in the paper                                                                                                                                                                                                                                                                                                                                                       |
| Setting                      | 5       | Describe the setting, locations, and relevant dates, including periods of recruitment, exposure, follow-up, and data collection                                                                                                                                                                                                                                                                               |
| Participants                 | 6       | (a) Give the eligibility criteria, and the sources and methods of selection of participants. Describe methods of follow-up<br>(b) For matched studies, give matching criteria and number of exposed and unexposed                                                                                                                                                                                             |
| Variables                    | 7       | Clearly define all outcomes, exposures, predictors, potential confounders, and effect modifiers. Give diagnostic criteria, if applicable                                                                                                                                                                                                                                                                      |
| Data sources/<br>measurement | 8*      | For each variable of interest, give sources of data and details of methods of assessment (measurement). Describe comparability of assessment methods if there is more than one group                                                                                                                                                                                                                          |
| Bias                         | 9       | Describe any efforts to address potential sources of bias                                                                                                                                                                                                                                                                                                                                                     |
| Study size                   | 10      | Explain how the study size was arrived at                                                                                                                                                                                                                                                                                                                                                                     |
| Quantitative variables       | 11      | Explain how quantitative variables were handled in the analyses. If applicable, describe which groupings were chosen and why                                                                                                                                                                                                                                                                                  |
| Statistical methods          | 12      | (a) Describe all statistical methods, including those used to control for confounding<br>(b) Describe any methods used to examine subgroups and interactions<br>(c) Explain how missing data were addressed<br>(d) If applicable, explain how loss to follow-up was addressed<br>(e) Describe any sensitivity analyses                                                                                        |
| <b>Results</b>               |         |                                                                                                                                                                                                                                                                                                                                                                                                               |
| Participants                 | 13*     | (a) Report numbers of individuals at each stage of study—eg numbers potentially eligible, examined for eligibility, confirmed eligible, included in the study, completing follow-up, and analysed<br>(b) Give reasons for non-participation at each stage<br>(c) Consider use of a flow diagram                                                                                                               |
| Descriptive data             | 14*     | (a) Give characteristics of study participants (eg demographic, clinical, social) and information on exposures and potential confounders<br>(b) Indicate number of participants with missing data for each variable of interest<br>(c) Summarise follow-up time (eg, average and total amount)                                                                                                                |
| Outcome data                 | 15*     | Report numbers of outcome events or summary measures over time                                                                                                                                                                                                                                                                                                                                                |
| Main results                 | 16      | (a) Give unadjusted estimates and, if applicable, confounder-adjusted estimates and their precision (eg, 95% confidence interval). Make clear which confounders were adjusted for and why they were included<br>(b) Report category boundaries when continuous variables were categorized<br>(c) If relevant, consider translating estimates of relative risk into absolute risk for a meaningful time period |



|                          |    |                                                                                                                                                                            |
|--------------------------|----|----------------------------------------------------------------------------------------------------------------------------------------------------------------------------|
| Other analyses           | 17 | Report other analyses done—eg analyses of subgroups and interactions, and sensitivity analyses                                                                             |
| <b>Discussion</b>        |    |                                                                                                                                                                            |
| Key results              | 18 | Summarise key results with reference to study objectives                                                                                                                   |
| Limitations              | 19 | Discuss limitations of the study, taking into account sources of potential bias or imprecision. Discuss both direction and magnitude of any potential bias                 |
| Interpretation           | 20 | Give a cautious overall interpretation of results considering objectives, limitations, multiplicity of analyses, results from similar studies, and other relevant evidence |
| Generalisability         | 21 | Discuss the generalisability (external validity) of the study results                                                                                                      |
| <b>Other information</b> |    |                                                                                                                                                                            |
| Funding                  | 22 | Give the source of funding and the role of the funders for the present study and, if applicable, for the original study on which the present article is based              |

\*Give information separately for exposed and unexposed groups.

**Note:** An Explanation and Elaboration article discusses each checklist item and gives methodological background and published examples of transparent reporting. The STROBE checklist is best used in conjunction with this article (freely available on the Web sites of PLoS Medicine at <http://www.plosmedicine.org/>, Annals of Internal Medicine at <http://www.annals.org/>, and Epidemiology at <http://www.epidem.com/>). Information on the STROBE Initiative is available at <http://www.strobe-statement.org>.



**Socio-demographic characteristics of women sustaining injuries during pregnancy,  
A Study from the Danish National Birth Cohort**

|                                 |                                                                                                                                                                             |
|---------------------------------|-----------------------------------------------------------------------------------------------------------------------------------------------------------------------------|
| Journal:                        | <i>BMJ Open</i>                                                                                                                                                             |
| Manuscript ID:                  | bmjopen-2012-000826.R1                                                                                                                                                      |
| Article Type:                   | Research                                                                                                                                                                    |
| Date Submitted by the Author:   | 16-Apr-2012                                                                                                                                                                 |
| Complete List of Authors:       | Virk, Jasveer; University of California at Los Angeles, Epidemiology<br>Hsu, Paul; University of California at Los Angeles, Epidemiology<br>Olsen, Jørn; Aarhus University, |
| <b>Primary Subject Heading</b>: | Epidemiology                                                                                                                                                                |
| Secondary Subject Heading:      | Public health                                                                                                                                                               |
| Keywords:                       | EPIDEMIOLGY, Prenatal diagnosis < OBSTETRICS, PUBLIC HEALTH                                                                                                                 |
|                                 |                                                                                                                                                                             |

SCHOLARONE™  
Manuscripts

STROBE Statement—Checklist of items that should be included in reports of *cohort studies*

|                              | Item No | Recommendation                                                                                                                                                                                                                                                                                                                                                                                                |
|------------------------------|---------|---------------------------------------------------------------------------------------------------------------------------------------------------------------------------------------------------------------------------------------------------------------------------------------------------------------------------------------------------------------------------------------------------------------|
| <b>Title and abstract</b>    | 1       | (a) Indicate the study's design with a commonly used term in the title or the abstract<br>(b) Provide in the abstract an informative and balanced summary of what was done and what was found                                                                                                                                                                                                                 |
| <b>Introduction</b>          |         |                                                                                                                                                                                                                                                                                                                                                                                                               |
| Background/rationale         | 2       | Explain the scientific background and rationale for the investigation being reported                                                                                                                                                                                                                                                                                                                          |
| Objectives                   | 3       | State specific objectives, including any prespecified hypotheses                                                                                                                                                                                                                                                                                                                                              |
| <b>Methods</b>               |         |                                                                                                                                                                                                                                                                                                                                                                                                               |
| Study design                 | 4       | Present key elements of study design early in the paper                                                                                                                                                                                                                                                                                                                                                       |
| Setting                      | 5       | Describe the setting, locations, and relevant dates, including periods of recruitment, exposure, follow-up, and data collection                                                                                                                                                                                                                                                                               |
| Participants                 | 6       | (a) Give the eligibility criteria, and the sources and methods of selection of participants. Describe methods of follow-up<br>(b) For matched studies, give matching criteria and number of exposed and unexposed                                                                                                                                                                                             |
| Variables                    | 7       | Clearly define all outcomes, exposures, predictors, potential confounders, and effect modifiers. Give diagnostic criteria, if applicable                                                                                                                                                                                                                                                                      |
| Data sources/<br>measurement | 8*      | For each variable of interest, give sources of data and details of methods of assessment (measurement). Describe comparability of assessment methods if there is more than one group                                                                                                                                                                                                                          |
| Bias                         | 9       | Describe any efforts to address potential sources of bias                                                                                                                                                                                                                                                                                                                                                     |
| Study size                   | 10      | Explain how the study size was arrived at                                                                                                                                                                                                                                                                                                                                                                     |
| Quantitative variables       | 11      | Explain how quantitative variables were handled in the analyses. If applicable, describe which groupings were chosen and why                                                                                                                                                                                                                                                                                  |
| Statistical methods          | 12      | (a) Describe all statistical methods, including those used to control for confounding<br>(b) Describe any methods used to examine subgroups and interactions<br>(c) Explain how missing data were addressed<br>(d) If applicable, explain how loss to follow-up was addressed<br>(e) Describe any sensitivity analyses                                                                                        |
| <b>Results</b>               |         |                                                                                                                                                                                                                                                                                                                                                                                                               |
| Participants                 | 13*     | (a) Report numbers of individuals at each stage of study—eg numbers potentially eligible, examined for eligibility, confirmed eligible, included in the study, completing follow-up, and analysed<br>(b) Give reasons for non-participation at each stage<br>(c) Consider use of a flow diagram                                                                                                               |
| Descriptive data             | 14*     | (a) Give characteristics of study participants (eg demographic, clinical, social) and information on exposures and potential confounders<br>(b) Indicate number of participants with missing data for each variable of interest<br>(c) Summarise follow-up time (eg, average and total amount)                                                                                                                |
| Outcome data                 | 15*     | Report numbers of outcome events or summary measures over time                                                                                                                                                                                                                                                                                                                                                |
| Main results                 | 16      | (a) Give unadjusted estimates and, if applicable, confounder-adjusted estimates and their precision (eg, 95% confidence interval). Make clear which confounders were adjusted for and why they were included<br>(b) Report category boundaries when continuous variables were categorized<br>(c) If relevant, consider translating estimates of relative risk into absolute risk for a meaningful time period |

|                          |    |                                                                                                                                                                            |
|--------------------------|----|----------------------------------------------------------------------------------------------------------------------------------------------------------------------------|
| Other analyses           | 17 | Report other analyses done—eg analyses of subgroups and interactions, and sensitivity analyses                                                                             |
| <b>Discussion</b>        |    |                                                                                                                                                                            |
| Key results              | 18 | Summarise key results with reference to study objectives                                                                                                                   |
| Limitations              | 19 | Discuss limitations of the study, taking into account sources of potential bias or imprecision. Discuss both direction and magnitude of any potential bias                 |
| Interpretation           | 20 | Give a cautious overall interpretation of results considering objectives, limitations, multiplicity of analyses, results from similar studies, and other relevant evidence |
| Generalisability         | 21 | Discuss the generalisability (external validity) of the study results                                                                                                      |
| <b>Other information</b> |    |                                                                                                                                                                            |
| Funding                  | 22 | Give the source of funding and the role of the funders for the present study and, if applicable, for the original study on which the present article is based              |

\*Give information separately for exposed and unexposed groups.

**Note:** An Explanation and Elaboration article discusses each checklist item and gives methodological background and published examples of transparent reporting. The STROBE checklist is best used in conjunction with this article (freely available on the Web sites of PLoS Medicine at <http://www.plosmedicine.org/>, Annals of Internal Medicine at <http://www.annals.org/>, and Epidemiology at <http://www.epidem.com/>). Information on the STROBE Initiative is available at <http://www.strobe-statement.org>.

## TITLE PAGE

**Socio-demographic characteristics of women sustaining injuries during pregnancy,  
A Study from the Danish National Birth Cohort****Corresponding author:**

Jasveer Virk, M.P.H, PhD

Southern California Injury Prevention Research Center  
University of California Los Angeles (UCLA)  
Department of Epidemiology  
71-264 CHS  
Los Angeles, 90095-1772  
Phone: 310-825-3516  
Fax: 310-206-6039  
[jasvirk@ucla.edu](mailto:jasvirk@ucla.edu)

Aarhus University  
Department of Public Health  
Bartholins Alle 2  
Building 1260, Room 230  
8000 Aarhus C  
Denmark

**Co-authors:**

Paul Hsu, PhD

Southern California Injury Prevention Research Center, Los Angeles  
University of California Los Angeles (UCLA)  
Department of Epidemiology  
Los Angeles

Jorn Olsen, M.D., PhD

Aarhus University  
Department of Public Health  
Bartholins Alle 2  
Building 1260, Room 230  
8000 Aarhus C  
Denmark

**Key words:** Cohort study, Descriptive study, Pregnancy, Birth outcomes

**Word count:** 1306

## Article summary

### Article Focus

- We describe adverse birth outcomes associated with injuries that took place among pregnant women in the Danish National Birth Cohort and include in our assessment injury severity, cause, and mechanism.

### Key Messages

- Injured pregnant women were more likely to deliver infants that were stillborn or have pregnancies that were terminated by spontaneous abortion. We did not detect an adverse effect between injuries sustained during pregnancy and delivery of preterm, low birth weight or small for gestational age infants, or infants with an APGAR score of less than 7.
- Women sustaining head or neck injuries were more likely to deliver an infant SGA and have a stillbirth, though these results were not statistically significant.

### Strengths and Limitations

- Previous studies have selected pregnant trauma patients or emergency room patients, our study however presents injuries among pregnant women from a general population.
- We only have data on late spontaneous abortions, and if injured fetuses are aborted early we would not detect an association.

## Abstract

**Objective:** To describe adverse birth outcomes associated with hospital treated injuries that took place among women in the Danish National Birth Cohort (DNBC).

**Design, Setting & Participants:** We utilized data from the DNBC, a longitudinal cohort of pregnant women and their offspring established during 1996–2002. Information was collected twice during pregnancy, at 12 and 30 weeks of gestation; and again when the children reached 6 and 18 months of age. To obtain information regarding birth outcomes, data for each woman were linked to the Danish National Birth Registry and the Danish National Patient Registry.

**Primary and Secondary Outcome Measures:** To determine if injured women were more likely to deliver an infant preterm, with low birth weight, stillborn or have a spontaneous abortion we estimated hazard ratios. Odds ratios were generated to assess APGAR scores and infants born small for gestational age. Models were adjusted for maternal smoking and drinking during pregnancy, household socioeconomic status, eclampsia/pre-eclampsia or gestational diabetes status during pregnancy and maternal age at birth; estimates for preterm birth were also adjusted for prior history of preterm birth.

**Results:** In our cohort of 90,452 pregnant women, 3,561 (3.9%) received medical treatment for an injury during pregnancy. Injured pregnant women were more likely to deliver infants that were stillborn or have pregnancies terminated by spontaneous abortion. We did not detect an adverse effect between injuries sustained during pregnancy and delivery of preterm, low birth weight or small for gestational age infants, or infants with an APGAR score of less than 7.

**Conclusion:** Our study shows that injuries occurring among women from an unselected population may not have an adverse effect on birth weight, gestational age, APGAR score, or small for gestational age status but may adversely affect the risk of stillbirth and spontaneous abortions in some situations.

## Introduction

During pregnancy, up to 7 percent of women sustain unintentional injuries [1]; and traumatic injuries are a major cause of maternal and neonatal morbidity and mortality [2,3]. The association of complications arising from blunt trauma in the presence of bleeding and contractions are evident but less is known about adverse birth outcomes linked to minor injuries. It is possible, that minor trauma during pregnancy may lead to sub-clinical chronic placental disruption that persists during pregnancy which may cause an increase in the risk for acute placental abruption, preterm labor, preterm premature rupture of the membranes, and placental insufficiency that restricts fetal growth [4]. But we know less about the occurrence of minor injuries as they are not captured the same way as severe injuries, and the impact they have on the fetus is expected to be small or not harmful. Not much is known about the context in which these injuries take place, and the socio demographic characteristics of women sustaining these injuries; and furthermore there is limited data on long term consequences of these injuries for the offspring. In this paper, we describe adverse birth outcomes associated with hospital treated injuries that took place among women in the Danish National Birth Cohort (DNBC); we include in our assessment injury severity, cause, and mechanism.

## Methods

We utilized data collected from the Danish National Birth Cohort (DNBC), which is a longitudinal population based cohort of pregnant women and their offspring established during 1996–2002. Women were contacted to take part in the study by physicians providing their primary care during pregnancy. Approximately half of all general practitioners in Denmark participated in the study; and approximately 60% of women who were invited participated. Additional information on study design and data collection methods for the DNBC are described elsewhere [5]. Information was collected twice during pregnancy using computer assisted telephone interviews, at gestational age 12 and 30 weeks; and again when the children reached 6 and 18 months of age. All Regional Ethics Committee in Denmark approved the



1  
2  
3 establishment of the cohort and this study was further approved by the Danish Data Protection Agency  
4 and UCLA Office for Protection of Research Subjects.  
5  
6

7  
8  
9 To obtain information regarding birth outcomes, data for each woman were linked through her personal  
10 civil registration number to the Danish National Birth Registry and the Danish National Patient Registry  
11 for the entire pregnancy period. The Danish National Birth Registry has collected data since 1968 for the  
12 primary purpose of monitoring the health of newborns and the quality of antenatal care, and has been  
13 increasingly used for research [6]. The gestational age at birth and birth weight was obtained from the  
14 Birth Register. Small for gestational age (SGA) was defined as a weight below the 10<sup>th</sup> percentile for  
15 gestational age, grouped by week, among children born in the DNBC.  
16  
17  
18  
19  
20  
21  
22  
23

24  
25 Information regarding injuries sustained during pregnancy was obtained from the Danish National Patient  
26 Registry, which contains data on all hospital stays and outpatient visits for the duration of each woman's  
27 pregnancy. For each admission or visit, the patient registry collects information on the primary discharge  
28 diagnosis (the discharge diagnosis that best describes the condition leading to the admission or outpatient  
29 visit and that is the primary reason for the prescribed and completed course of tests and treatments) and up  
30 to 20 subsidiary diagnoses. It also collects information on external cause of injury, including the mode,  
31 location, and mechanism causing the injury. Data were extracted with the use of *International*  
32 *Classification of Diseases, 10th Revision* (ICD Website, 2007) [6] and the second edition of the Nordic  
33 Medico-Statistical Committee's (NOMESCO) Classification of External Causes of Injuries (NCECI) [8].  
34  
35  
36  
37  
38  
39  
40  
41  
42  
43  
44

45  
46 **We identified 90,452 women who completed the first interview.** All injuries were classified by the body  
47 location and mechanism causing the injury; transportation injuries were further described by mode of  
48 transportation. Women were categorized as injured if they sustained an injury at any point during  
49 pregnancy, regardless of mode, body region, and mechanism causing the injury; and uninjured otherwise.  
50  
51  
52  
53  
54  
55  
56  
57  
58  
59  
60

1  
2  
3 To determine if injured women were more likely to deliver preterm (<34 weeks, 34-36 weeks,  $\geq 37$   
4 weeks), low birth weight (<1500 grams, 1500-2499 grams,  $\geq 2500$  grams), stillbirth or have a spontaneous  
5 abortion, we estimated Cox proportional hazard ratios (HRs) using PROC PHREG in SAS Statistical  
6 Software, to allow for a time-to-event analysis. These models were adjusted for maternal smoking and  
7 drinking during pregnancy, household socioeconomic status, eclampsia/pre-eclampsia or gestational  
8 diabetes status during pregnancy and maternal age at birth; estimates for preterm birth were also adjusted  
9 for prior history of preterm birth. To determine if injured women were more likely to deliver SGA infants  
10 or infants with an APGAR score of <3 or between 4-6 using  $\geq 7$  as a baseline, we generated odds ratios  
11 (ORs) using PROC GENMOD in SAS statistical software. To assess severity of injuries sustained we  
12 compared women who sustained head, and head and neck injuries to uninjured women.  
13  
14  
15  
16  
17  
18  
19  
20  
21  
22  
23  
24  
25

## 26 Results

27  
28 In our cohort of 90,452 pregnant women, 3,561 (3.9%) received medical treatment for an injury during  
29 their pregnancy. Socio demographic characteristics of all women in the cohort are presented in table 1.  
30 Results have been stratified by presence/absence of injury. Injured women were younger, smoked  
31 cigarettes more often and had lower household socioeconomic status. Injury characteristics such as mode  
32 of injury, activity engaged in while sustaining injury, mechanism causing injury and body region of injury  
33 are presented in table 2. Approximately one third of the injuries were due to falls and took place during a  
34 leisure activity. Less than one fifth of the injuries were related to transportation. Hazard and odds ratios  
35 are presented in table 3. We found that injured pregnant women were slightly more likely to deliver  
36 infants that were stillborn or have pregnancies were terminated by spontaneous abortion. We did not  
37 detect an adverse effect between injuries sustained during pregnancy and delivery of preterm, low birth  
38 weight or small for gestational age infants, or infants with an APGAR score of less than 7.  
39  
40  
41  
42  
43  
44  
45  
46  
47  
48  
49  
50  
51  
52  
53

## 54 Discussion

1  
2  
3 Our study shows that injuries occurring in an unselected Danish population of pregnant women do not  
4 adversely affect birth weight, gestational age, APGAR scores, or SGA status but are adversely associated  
5 with stillbirth and spontaneous abortion. Adverse pregnancy outcomes resulting from maternal injury  
6 have been documented in other studies [9-24]. Severely injured pregnant women are more likely to have  
7 preterm labor, placental abruption, cesarean-section, uterine rupture, low birth-weight, and their infants  
8 are more likely to result in pre-term delivery and suffer from fetal distress, asphyxia, respiratory distress  
9 syndrome and circum to fetal, neonatal and infant death compared to their uninjured counterparts [14].  
10  
11 Minor trauma has also been recognized as contributor to poor fetal outcomes. Fischer et al. found minor  
12 injuries were associated with fetal demise, preterm birth and low birth weight [25]. We were not able to  
13 corroborate these findings, possibly due to the nature of the health care system in Denmark, where the  
14 first point of medical intervention is often with a primary care physician. It is possible that we missed  
15 detection of injuries seen by midwives or the primary care physician, which restrict our effect estimates to  
16 more severe outcomes.  
17  
18  
19  
20  
21  
22  
23  
24  
25  
26  
27  
28  
29  
30  
31  
32

33 Our results may not apply to other healthcare settings. This study is based on a Danish population which  
34 has low fertility and where most women take part in the work force. Furthermore, duration of pregnancy  
35 leave is generous, compensated, and accesses to health care services are covered at no cost to patients. In  
36 this study we were able to assess socio-demographic characteristics of this population and our data shows  
37 that injured women were slightly younger than their non-injured counterparts. Trends in household socio-  
38 economic status also seemed to differ slightly; there were fewer injured women with higher-grade  
39 professional household status and more injured women with unskilled work status, compared to their non-  
40 injured counterparts. Injured women were also slightly more likely to smoke cigarettes and consume  
41 three or more alcoholic drinks per week. The high prevalence of binge drinking in the DNBC occurred  
42 often at very early stage of pregnancy, when pregnancy status may be uncertain or unknown to the  
43 mother. Nine out of ten traumatic injuries during pregnancy are minor; however, 60-70% of fetal losses  
44 during pregnancy have been reported as a result of minor injuries [17]. In this study we only have data on  
45  
46  
47  
48  
49  
50  
51  
52  
53  
54  
55  
56  
57  
58  
59  
60

1  
2  
3 late spontaneous abortions, and if injured fetuses are aborted early it may explain why we detect limited  
4  
5 associations among newborns.  
6

7  
8 Future studies should focus on long term infant outcomes that extend beyond the perinatal period, to fully  
9  
10 assess the effects of maternal injury. Additional research evaluating maternal characteristics that may  
11  
12 influence injury severity and proneness may aid in maternal injury prevention. At present it is reassuring  
13  
14 that even women hospitalized for an injury during pregnancy will in only a few cases have an excess risk  
15  
16 of having an adverse pregnancy outcome.  
17

### 18 19 20 21 **Author Contributions**

22  
23 JV, JO, and PH contributed to conception and design of the paper. JO contributed to acquisition of data.  
24  
25 JV and PH contributed to analysis of the data. JV, JO and PH contributed to interpretation of data. JV  
26  
27 wrote the original paper draft; JO and PH contributed to revisions of the paper. JV, JO and PH approved  
28  
29 the final version of the paper to be published.  
30  
31

### 32 33 34 **Data Sharing Statement**

35  
36 There is no additional data available.  
37  
38

### 39 40 41 **Funding Statement**

42  
43 This research received no specific grant from any funding agency in the public, commercial or not-for-  
44  
45 profit sectors.  
46  
47

### 48 49 50 **Competing Interests Statement**

51  
52 The authors of this paper declare no competing interests.  
53  
54  
55  
56  
57  
58  
59  
60

**Table 1: Demographic statistics on study population stratified by injury status and department of hospital admittance**

|                                                  | Total cohort |      | Non-Injured<br>n=86891 |      | Injured <sup>±</sup><br>n=3561 |      | Head or Neck Injuries<br>n=534 |       |
|--------------------------------------------------|--------------|------|------------------------|------|--------------------------------|------|--------------------------------|-------|
| Characteristics                                  | N            | (%)  | N                      | (%)  | N                              | (%)  | N                              | (%)   |
| <b>Maternal age at delivery</b>                  |              |      |                        |      |                                |      |                                |       |
| <25 yr                                           | 8695         | 9.6  | 8142                   | 9.4  | 553                            | 15.5 | 86                             | 16.1  |
| 25-29 yr                                         | 34726        | 38.4 | 33341                  | 38.4 | 1385                           | 38.9 | 194                            | 36.3  |
| 30-34 yr                                         | 33537        | 37.1 | 32392                  | 37.3 | 1145                           | 32.2 | 180                            | 33.7  |
| 35-39 yr                                         | 12006        | 13.3 | 11594                  | 13.3 | 412                            | 11.6 | 63                             | 11.8  |
| ≥40 yr                                           | 1488         | 1.6  | 1422                   | 1.6  | 66                             | 1.9  | 11                             | 2.1   |
| <b>Gestational age at delivery (weeks)</b>       |              |      |                        |      |                                |      |                                |       |
| < 34                                             | 1227         | 1.5  | 1177                   | 1.4  | 50                             | 1.5  | 9                              | 1.8   |
| 34-36                                            | 2756         | 3.2  | 2629                   | 3.2  | 127                            | 3.8  | 20                             | 4.0   |
| ≥37                                              | 82642        | 95.3 | 79454                  | 95.4 | 3188                           | 94.7 | 475                            | 94.2  |
| <b>Birth weight (grams)</b>                      |              |      |                        |      |                                |      |                                |       |
| < 1500                                           | 538          | 0.6  | 538                    | 0.6  | 18                             | 0.5  | 4                              | 0.8   |
| 1500-2499                                        | 2074         | 2.5  | 2074                   | 2.5  | 101                            | 3.0  | 15                             | 3.0   |
| ≥2500                                            | 80451        | 96.9 | 80451                  | 96.9 | 3238                           | 96.5 | 484                            | 96.2  |
| <b>Sex of child</b>                              |              |      |                        |      |                                |      |                                |       |
| Female                                           | 42284        | 48.8 | 40696                  | 48.8 | 1588                           | 47.2 | 236                            | 46.8  |
| Male                                             | 44435        | 51.2 | 42656                  | 51.2 | 1779                           | 52.8 | 268                            | 53.2  |
| <b>Parity</b>                                    |              |      |                        |      |                                |      |                                |       |
| 1                                                | 39224        | 46.3 | 37569                  | 47.2 | 1655                           | 50.7 | 238                            | 48.1  |
| 2                                                | 31604        | 37.3 | 30463                  | 38.3 | 1141                           | 35.0 | 192                            | 38.8  |
| 3+                                               | 13859        | 16.4 | 11593                  | 14.6 | 466                            | 14.3 | 65                             | 13.1  |
| <b>Smoking status</b>                            |              |      |                        |      |                                |      |                                |       |
| None                                             | 64589        | 73.4 | 62299                  | 73.7 | 2290                           | 66.7 | 344                            | 67.3  |
| Stopped during pregnancy                         | 12530        | 14.2 | 11923                  | 14.1 | 607                            | 17.7 | 91                             | 17.8  |
| 1-10                                             | 10725        | 12.2 | 10193                  | 12.1 | 532                            | 15.5 | 76                             | 14.9  |
| ≥10                                              | 120          | 0.1  | 117                    | 0.1  | 3                              | 0.1  | 0                              | 0     |
| <b>Average alcohol consumption (drinks/week)</b> |              |      |                        |      |                                |      |                                |       |
| None                                             | 41325        | 64.9 | 39642                  | 64.7 | 1683                           | 68.8 | 270                            | 34.3  |
| 1                                                | 10480        | 16.5 | 10124                  | 16.5 | 356                            | 14.5 | 466                            | 59.2  |
| 2                                                | 6872         | 10.8 | 6649                   | 10.9 | 223                            | 9.1  | 29                             | 3.7   |
| 3                                                | 2554         | 4.0  | 2462                   | 4.0  | 92                             | 3.8  | 7                              | 0.9   |
| 4+                                               | 2442         | 3.8  | 2351                   | 3.8  | 91                             | 3.7  | 15                             | 1.977 |
| ≥5 at one time                                   | 26779        | 30.8 | 25663                  | 29.5 | 1116                           | 31.3 | 167                            | 31.2  |

|                                        |       |      |       |      |      |      |     |      |
|----------------------------------------|-------|------|-------|------|------|------|-----|------|
| <b>Household socio-economic status</b> |       |      |       |      |      |      |     |      |
| Higher-grade professionals             | 20713 | 23.5 | 19989 | 23.6 | 724  | 21.1 | 126 | 24.7 |
| Middle-grade professionals             | 27304 | 31.0 | 26326 | 31.1 | 978  | 28.5 | 135 | 26.4 |
| Skilled work                           | 24577 | 27.9 | 23587 | 27.9 | 990  | 28.8 | 143 | 28.0 |
| Unskilled work                         | 12408 | 14.1 | 11804 | 14.0 | 604  | 17.6 | 83  | 16.2 |
| Student                                | 2075  | 2.4  | 1991  | 2.4  | 84   | 2.4  | 11  | 2.2  |
| Unemployed > 1 yr                      | 683   | 0.8  | 641   | 0.8  | 42   | 1.2  | 9   | 1.8  |
| Unclassified                           | 204   | 0.2  | 194   | 0.2  | 10   | 0.3  | 4   | 0.8  |
| <b>Partner cohabitation status</b>     |       |      |       |      |      |      |     |      |
| Cohabits                               | 66859 | 99.0 | 64359 | 98.1 | 2500 | 98.1 | 353 | 98.1 |
| Does not cohabit                       | 687   | 1.0  | 639   | 1.9  | 48   | 1.95 | 7   | 1.95 |
| <b>Place of delivery</b>               |       |      |       |      |      |      |     |      |
| Urban*                                 | 48570 | 53.7 | 46681 | 53.0 | 1889 | 53.0 | 274 | 51.3 |
| Rural                                  | 41882 | 46.3 | 40210 | 47.0 | 1672 | 47.0 | 260 | 48.7 |
| <b>Outcome</b>                         |       |      |       |      |      |      |     |      |
| Low birth weight (<2500 grams)         | 2731  | 3.0  | 2612  | 3.0  | 119  | 3.8  | 19  | 3.6  |
| Preterm birth (<37 weeks)              | 3886  | 4.3  | 3715  | 4.3  | 171  | 4.8  | 29  | 5.4  |
| Small for gestational age (SGA)        | 8528  | 9.4  | 8162  | 9.4  | 336  | 9.4  | 59  | 11.0 |
| Spontaneous abortion                   | 3355  | 3.7  | 3181  | 3.7  | 174  | 4.9  | 27  | 5.1  |
| Stillbirth                             | 288   | 0.3  | 271   | 0.3  | 17   | 0.5  | 3   | 0.6  |
| Apgar Score <7                         | 605   | 0.7  | 586   | 0.7  | 19   | 0.5  | 1   | 0.2  |

\*Urban residence include Aarhus, Gentofte, Frederiksberg, Odense, Aalborg

\*\*Missing values: gestational age=184, birth weight=389, sex of child=90, parity=5765, smoking=1155, cohabitation status=22,920

‡ P-values less than 0.05 stratified by injury status and calculated by chi-square test: maternal age, parity, maternal smoking, alcohol consumption, household socio-economic status and partner cohabitation status

**Table 2: Description of Injuries**

|                                                             |     |
|-------------------------------------------------------------|-----|
| <b><i>Mode of Injury</i></b>                                |     |
| Knock, blow caused by fall on the same level                | 519 |
| Knock, blow caused by fall on stairway/lower level          | 381 |
| Knock, blow due to bodily contact with object/animal/person | 975 |
| Crushing/cut/sting                                          | 621 |
| Foreign object                                              | 115 |
| Chemical influence                                          | 28  |
| Thermal/electrical impact or radiation                      | 55  |
| Acute overload of the whole or part of the body             | 331 |
| Other/unspecified cause of injury                           | 74  |
| <b><i>Activity during injury</i></b>                        |     |
| Sport, exercise                                             | 185 |
| Play, hobby and other leisure activity                      | 913 |
| Work                                                        | 545 |
| Vital activity*                                             | 300 |
| Unpaid work                                                 | 161 |
| Other activity/Unspecified                                  | 765 |
| <b><i>Description of transportation injuries</i></b>        |     |
| On foot                                                     | 12  |
| Bicycle                                                     | 131 |
| Moped/Motorbike/scooter                                     | 21  |
| Car                                                         | 351 |
| Delivery van/truck/bus or other                             | 10  |
| Other/Unspecified transportation                            | 7   |

\*includes sleep, rest, taking meals and personal hygiene

**Table 3: Odds and Hazard Ratios, and 95% Confidence Limits for adverse birth outcomes following maternal exposure to injuries during pregnancy\***

| Outcome                                |             | Non-Injured Women N=87252 | Injured Women N=2938 | Women with head or neck injuries N=462 | Women with head injuries N=312 |
|----------------------------------------|-------------|---------------------------|----------------------|----------------------------------------|--------------------------------|
| Small for gestational age <sup>†</sup> |             | reference                 | 1.05 (0.94, 1.18)    | 1.15 (0.87, 1.51)                      | 1.18 (0.84, 1.64)              |
| Spontaneous abortion <sup>‡</sup>      |             | reference                 | 1.18 (0.99, 1.40)    | 1.02 (0.68, 1.53)                      | 0.93 (0.55, 1.58)              |
| Stillbirth <sup>‡</sup>                |             | reference                 | 1.67 (1.01, 2.77)    | 2.14 (0.69, 6.70)                      | 3.24 (1.04, 10.10)             |
| Low birth weight (grams) <sup>‡</sup>  | <1500       | -                         | 0.76 (0.39, 1.48)    | 0.89 (0.22, 3.57)                      | 0.83 (0.12, 5.95)              |
|                                        | 1500-2499   | -                         | 1.05 (0.90, 1.23)    | 0.99 (0.68, 1.45)                      | 1.09 (0.70, 1.71)              |
|                                        | ≥2500       | -                         | Reference            | Reference                              | Reference                      |
| Preterm birth <sup>‡</sup>             | <34 weeks   | -                         | 0.76 (0.39, 1.48)    | 0.89 (0.22, 3.57)                      | 0.83 (0.12, 5.95)              |
|                                        | 34-36 weeks | -                         | 1.05 (0.90, 1.23)    | 0.99 (0.68, 1.45)                      | 1.09 (0.70, 1.71)              |
|                                        | ≥37 weeks   | -                         | reference            | reference                              | Reference                      |
| APGAR Score <sup>†</sup>               | ≤3          | -                         | 1.15 (0.83, 1.60)    | not enough data                        | not enough data                |
|                                        | 4-6         | -                         | 0.78 (0.47, 1.31)    | not enough data                        | not enough data                |
|                                        | 7-10        | -                         | Reference            | reference                              | Reference                      |

\*All models were adjusted for maternal smoking and drinking during pregnancy, household socioeconomic status, and maternal age at birth, preterm birth model includes all aforementioned variables and history of preterm birth; Non-Injured women were used as the comparison group.

<sup>†</sup> Odds Ratios, <sup>‡</sup> Hazard Ratios



## REFERENCES:

1. Chames MC, Pearlman MD. Trauma during pregnancy: outcomes and clinical management. *Clin Obstet Gynecol.* 2008;51(2):398-408.
2. Oxford CM, Ludmir J. Trauma in pregnancy. *Clin Obstet Gynecol.* 2009;52(4):611-29.
3. Mirza FG, Devine PC, Gaddipati S. Trauma in pregnancy: a systematic approach. *Am J Perinatol.* 2010;27(7):579-86.
4. Melamed N, Aviram A, Silver M, Peled Y, Wiznitzer A, Glezerman M, Yogev Y. Pregnancy course and outcome following blunt trauma. *J Matern Fetal Neonatal Med.* 2012 Feb 1. [Epub ahead of print]
5. Olsen J, Melbye M, Olsen SF, Sorensen TIA, Aaby P, et. Al. The Danish National Birth Cohort – its background, structure and aim. *Scand J Public Health.* 2001;29:300-307.
6. Virk J, Zhang J, Olsen J. Medical abortion and the risk of subsequent pregnancy outcomes. *N Engl J Med.* 2007;357(7):648-53.
7. International Classification of Diseases (ICD) online. Geneva: World Health Organization. (Accessed July 20, 2007, at <http://www.who.int/classifications/icd/en/>.)
8. Nordic Medico-Statistical Committee's (NOMESCO) Classification of External Causes of Injuries (NCECI).
9. Schiff MA, Holt VL, Daling JR. Maternal and infant outcomes after injury during pregnancy in Washington State from 1989 to 1997. *J Trauma.* 2002;53(5):939-45.
10. Ikossi DG, Lazar AA, Morabito D, et al. Profile of mothers at risk: an analysis of injury and pregnancy loss in 1,195 trauma patients. *J Am Coll Surg.* 2005;200(1):49-56. Erratum in: *J Am Coll Surg.* 2005;200(3):482.
11. Weiss HB, Lawrence B, Miller T. Prevalence and risk of hospitalized pregnant occupants in car crashes. *Annu Proc Assoc Adv Automot Med.* 2002;46:355-66.
12. Weiss HB, Strotmeyer S. Characteristics of pregnant women in motor vehicle crashes. *Inj Prev.* 2002;8(3):207-10.

13. Schiff MA, Holt VL. Pregnancy outcomes following hospitalization for motor vehicle crashes in Washington State from 1989 to 2001. *Am J Epidemiol.* 2005;161(6):503-10.
14. El-Kady D, Gilbert WM, Anderson J, et al. Trauma during pregnancy: an analysis of maternal and fetal outcomes in a large population. *Am J Obstet Gynecol.* 2004;190(6):1661-8.
15. Hitosugi M, Motozawa Y, Kido M, et al. Traffic injuries of the pregnant women and fetal or neonatal outcomes. *Forensic Sci Int.* 2006;159(1):51-4.
16. Hyde LK, Cook LJ, Olson LM, et al. Effect of motor vehicle crashes on adverse fetal outcomes. *Obstet Gynecol.* 2003;102(2):279-86.
17. El Kady. Perinatal outcomes of traumatic injuries during pregnancy. *Clin Obstet Gynecol.* 2007;50(3):582-91.
18. El Kady D, Gilbert WM, Xing G, et al. Maternal and neonatal outcomes of assaults during pregnancy. *Obstet Gynecol.* 2005;105(2):357-63.
19. El Kady D, Gilbert WM, Xing G, et al. Association of maternal fractures with adverse perinatal outcomes. *Am J Obstet Gynecol.* 2006;195(3):711-6.
20. Gandhi SG, Gilbert WM, McElvy SS, et al. Maternal and neonatal outcomes after attempted suicide. *Obstet Gynecol.* 2006;107(5):984-90.
21. Lipsky S, Holt VL, Easterling TR, et al. Police-reported intimate partner violence during pregnancy and the risk of antenatal hospitalization. *Matern Child Health J.* 2004;8(2):55-63.
22. Patterson RM. Trauma in pregnancy. *Clin Obstet Gynecol.* 1984;27:32-38.
23. Shah KH, Simons RK, Holbrook T, et al. Trauma in pregnancy: maternal and fetal outcomes. *J Trauma.* 1998;45(1):83-6.
24. Weiss HB, Songer TJ, Fabio A. Fetal deaths related to maternal injury. *JAMA.* 2001;286(15):1863-8.

- 1  
2  
3 25. Fischer PE, Zarzaur BL, Fabian TC, Magnotti LJ, Croce MA. Minor Trauma is an  
4  
5 Unrecognized Contributor to Poor Fetal Outcomes: A Population-Based Study of 78,552  
6  
7 Pregnancies. *J Trauma*. 2011;71(1):90-93.  
8  
9  
10 26. Mattox KL, Goetzl L. Trauma in Pregnancy. *Crit Care Med*. 2005;33(10):S385-9.  
11  
12  
13  
14  
15  
16  
17  
18  
19  
20  
21  
22  
23  
24  
25  
26  
27  
28  
29  
30  
31  
32  
33  
34  
35  
36  
37  
38  
39  
40  
41  
42  
43  
44  
45  
46  
47  
48  
49  
50  
51  
52  
53  
54  
55  
56  
57  
58  
59  
60

1  
2  
3  
4  
5  
6  
7  
8  
9  
10  
11  
12  
13  
14  
15  
16  
17  
18  
19  
20  
21  
22  
23  
24  
25  
26  
27  
28  
29  
30  
31  
32  
33  
34  
35  
36  
37  
38  
39  
40  
41  
42  
43  
44  
45  
46  
47  
48  
49  
50  
51  
52  
53  
54  
55  
56  
57  
58  
59  
60

For peer review only

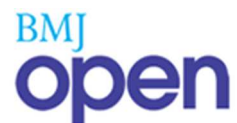

**Socio-demographic characteristics of women sustaining injuries during pregnancy,  
A Study from the Danish National Birth Cohort**

|                                 |                                                                                                                                                                             |
|---------------------------------|-----------------------------------------------------------------------------------------------------------------------------------------------------------------------------|
| Journal:                        | <i>BMJ Open</i>                                                                                                                                                             |
| Manuscript ID:                  | bmjopen-2012-000826.R2                                                                                                                                                      |
| Article Type:                   | Research                                                                                                                                                                    |
| Date Submitted by the Author:   | 17-May-2012                                                                                                                                                                 |
| Complete List of Authors:       | Virk, Jasveer; University of California at Los Angeles, Epidemiology<br>Hsu, Paul; University of California at Los Angeles, Epidemiology<br>Olsen, Jørn; Aarhus University, |
| <b>Primary Subject Heading</b>: | Epidemiology                                                                                                                                                                |
| Secondary Subject Heading:      | Public health                                                                                                                                                               |
| Keywords:                       | EPIDEMIOLGY, Prenatal diagnosis < OBSTETRICS, PUBLIC HEALTH                                                                                                                 |
|                                 |                                                                                                                                                                             |

SCHOLARONE™  
Manuscripts

STROBE Statement—Checklist of items that should be included in reports of *cohort studies*

|                              | Item No | Recommendation                                                                                                                                                                                                                                                                                                                                                                                                |
|------------------------------|---------|---------------------------------------------------------------------------------------------------------------------------------------------------------------------------------------------------------------------------------------------------------------------------------------------------------------------------------------------------------------------------------------------------------------|
| <b>Title and abstract</b>    | 1       | (a) Indicate the study's design with a commonly used term in the title or the abstract<br>(b) Provide in the abstract an informative and balanced summary of what was done and what was found                                                                                                                                                                                                                 |
| <b>Introduction</b>          |         |                                                                                                                                                                                                                                                                                                                                                                                                               |
| Background/rationale         | 2       | Explain the scientific background and rationale for the investigation being reported                                                                                                                                                                                                                                                                                                                          |
| Objectives                   | 3       | State specific objectives, including any prespecified hypotheses                                                                                                                                                                                                                                                                                                                                              |
| <b>Methods</b>               |         |                                                                                                                                                                                                                                                                                                                                                                                                               |
| Study design                 | 4       | Present key elements of study design early in the paper                                                                                                                                                                                                                                                                                                                                                       |
| Setting                      | 5       | Describe the setting, locations, and relevant dates, including periods of recruitment, exposure, follow-up, and data collection                                                                                                                                                                                                                                                                               |
| Participants                 | 6       | (a) Give the eligibility criteria, and the sources and methods of selection of participants. Describe methods of follow-up<br>(b) For matched studies, give matching criteria and number of exposed and unexposed                                                                                                                                                                                             |
| Variables                    | 7       | Clearly define all outcomes, exposures, predictors, potential confounders, and effect modifiers. Give diagnostic criteria, if applicable                                                                                                                                                                                                                                                                      |
| Data sources/<br>measurement | 8*      | For each variable of interest, give sources of data and details of methods of assessment (measurement). Describe comparability of assessment methods if there is more than one group                                                                                                                                                                                                                          |
| Bias                         | 9       | Describe any efforts to address potential sources of bias                                                                                                                                                                                                                                                                                                                                                     |
| Study size                   | 10      | Explain how the study size was arrived at                                                                                                                                                                                                                                                                                                                                                                     |
| Quantitative variables       | 11      | Explain how quantitative variables were handled in the analyses. If applicable, describe which groupings were chosen and why                                                                                                                                                                                                                                                                                  |
| Statistical methods          | 12      | (a) Describe all statistical methods, including those used to control for confounding<br>(b) Describe any methods used to examine subgroups and interactions<br>(c) Explain how missing data were addressed<br>(d) If applicable, explain how loss to follow-up was addressed<br>(e) Describe any sensitivity analyses                                                                                        |
| <b>Results</b>               |         |                                                                                                                                                                                                                                                                                                                                                                                                               |
| Participants                 | 13*     | (a) Report numbers of individuals at each stage of study—eg numbers potentially eligible, examined for eligibility, confirmed eligible, included in the study, completing follow-up, and analysed<br>(b) Give reasons for non-participation at each stage<br>(c) Consider use of a flow diagram                                                                                                               |
| Descriptive data             | 14*     | (a) Give characteristics of study participants (eg demographic, clinical, social) and information on exposures and potential confounders<br>(b) Indicate number of participants with missing data for each variable of interest<br>(c) Summarise follow-up time (eg, average and total amount)                                                                                                                |
| Outcome data                 | 15*     | Report numbers of outcome events or summary measures over time                                                                                                                                                                                                                                                                                                                                                |
| Main results                 | 16      | (a) Give unadjusted estimates and, if applicable, confounder-adjusted estimates and their precision (eg, 95% confidence interval). Make clear which confounders were adjusted for and why they were included<br>(b) Report category boundaries when continuous variables were categorized<br>(c) If relevant, consider translating estimates of relative risk into absolute risk for a meaningful time period |

|                          |    |                                                                                                                                                                            |
|--------------------------|----|----------------------------------------------------------------------------------------------------------------------------------------------------------------------------|
| Other analyses           | 17 | Report other analyses done—eg analyses of subgroups and interactions, and sensitivity analyses                                                                             |
| <b>Discussion</b>        |    |                                                                                                                                                                            |
| Key results              | 18 | Summarise key results with reference to study objectives                                                                                                                   |
| Limitations              | 19 | Discuss limitations of the study, taking into account sources of potential bias or imprecision. Discuss both direction and magnitude of any potential bias                 |
| Interpretation           | 20 | Give a cautious overall interpretation of results considering objectives, limitations, multiplicity of analyses, results from similar studies, and other relevant evidence |
| Generalisability         | 21 | Discuss the generalisability (external validity) of the study results                                                                                                      |
| <b>Other information</b> |    |                                                                                                                                                                            |
| Funding                  | 22 | Give the source of funding and the role of the funders for the present study and, if applicable, for the original study on which the present article is based              |

\*Give information separately for exposed and unexposed groups.

**Note:** An Explanation and Elaboration article discusses each checklist item and gives methodological background and published examples of transparent reporting. The STROBE checklist is best used in conjunction with this article (freely available on the Web sites of PLoS Medicine at <http://www.plosmedicine.org/>, Annals of Internal Medicine at <http://www.annals.org/>, and Epidemiology at <http://www.epidem.com/>). Information on the STROBE Initiative is available at <http://www.strobe-statement.org>.

## TITLE PAGE

**Socio-demographic characteristics of women sustaining injuries during pregnancy,  
A Study from the Danish National Birth Cohort****Corresponding author:**

Jasveer Virk, M.P.H, PhD

Southern California Injury Prevention Research Center  
University of California Los Angeles (UCLA)  
Department of Epidemiology  
71-264 CHS  
Los Angeles, 90095-1772  
Phone: 310-825-3516  
Fax: 310-206-6039  
[jasvirk@ucla.edu](mailto:jasvirk@ucla.edu)

Aarhus University  
Department of Public Health  
Bartholins Alle 2  
Building 1260, Room 230  
8000 Aarhus C  
Denmark

**Co-authors:**

Paul Hsu, PhD

Southern California Injury Prevention Research Center, Los Angeles  
University of California Los Angeles (UCLA)  
Department of Epidemiology  
Los Angeles

Jorn Olsen, M.D., PhD

Aarhus University  
Department of Public Health  
Bartholins Alle 2  
Building 1260, Room 230  
8000 Aarhus C  
Denmark

**Key words:** Cohort study, Descriptive study, Pregnancy, Birth outcomes



1  
2  
3 **Word count:** 1306  
4

5  
6 **Article summary**  
7

8 **Article Focus**  
9

- 10 - We describe adverse birth outcomes associated with injuries that took place among pregnant  
11 women in the Danish National Birth Cohort and include in our assessment injury severity,  
12 cause, and mechanism.  
13  
14

15  
16 **Key Messages**  
17

- 18 - Injured pregnant women were more likely to deliver infants that were stillborn or have  
19 pregnancies that were terminated by spontaneous abortion. We did not detect an adverse  
20 effect between injuries sustained during pregnancy and delivery of preterm, low birth weight  
21 or small for gestational age infants, or infants with an APGAR score of less than 7.  
22  
23 - Women sustaining head or neck injuries were more likely to deliver an infant SGA and have  
24 a stillbirth, though these results were not statistically significant.  
25  
26  
27  
28  
29  
30

31 **Strengths and Limitations**  
32

- 33 - Previous studies have selected pregnant trauma patients or emergency room patients, our  
34 study however presents injuries among pregnant women from a general population.  
35  
36 - We only have data on late spontaneous abortions, and if injured fetuses are aborted early we  
37 would not detect an association.  
38  
39  
40  
41  
42  
43  
44  
45  
46  
47  
48  
49  
50  
51  
52  
53  
54  
55  
56  
57  
58  
59  
60

## Abstract

**Objective:** To describe adverse birth outcomes associated with hospital treated injuries that took place among women in the Danish National Birth Cohort (DNBC).

**Design, Setting & Participants:** We utilized data from the DNBC, a longitudinal cohort of pregnant women and their offspring established during 1996–2002. Information was collected twice during pregnancy, at 12 and 30 weeks of gestation; and again when the children reached 6 and 18 months of age. To obtain information regarding birth outcomes, data for each woman were linked to the Danish National Birth Registry and the Danish National Patient Registry.

**Primary and Secondary Outcome Measures:** To determine if injured women were more likely to deliver an infant preterm, with low birth weight, stillborn or have a spontaneous abortion we estimated hazard ratios. Odds ratios were generated to assess APGAR scores and infants born small for gestational age. Models were adjusted for maternal smoking and drinking during pregnancy, household socioeconomic status, eclampsia/pre-eclampsia or gestational diabetes status during pregnancy and maternal age at birth; estimates for preterm birth were also adjusted for prior history of preterm birth.

**Results:** In our cohort of 90,452 pregnant women, 3,561 (3.9%) received medical treatment for an injury during pregnancy. Injured pregnant women were more likely to deliver infants that were stillborn or have pregnancies terminated by spontaneous abortion. We did not detect an adverse effect between injuries sustained during pregnancy and delivery of preterm, low birth weight or small for gestational age infants, or infants with an APGAR score of less than 7.

**Conclusion:** Our study shows that injuries occurring among women from an unselected population may not have an adverse effect on birth weight, gestational age, APGAR score, or small for gestational age status but may adversely affect the risk of stillbirth and spontaneous abortions in some situations.

## Introduction

During pregnancy, up to 7 percent of women sustain unintentional injuries [1]; and traumatic injuries are a major cause of maternal and neonatal morbidity and mortality [2,3]. The association of complications arising from blunt trauma in the presence of bleeding and contractions are evident but less is known about adverse birth outcomes linked to minor injuries. It is possible, that minor trauma during pregnancy may lead to sub-clinical chronic placental disruption that persists during pregnancy which may cause an increase in the risk for acute placental abruption, preterm labor, preterm premature rupture of the membranes, and placental insufficiency that restricts fetal growth [4]. But we know less about the occurrence of minor injuries as they are not captured the same way as severe injuries, and the impact they have on the fetus is expected to be small or not harmful. Not much is known about the context in which these injuries take place, and the socio demographic characteristics of women sustaining these injuries; and furthermore there is limited data on long term consequences of these injuries for the offspring. In this paper, we describe adverse birth outcomes associated with hospital treated injuries that took place among women in the Danish National Birth Cohort (DNBC); we include in our assessment injury severity, cause, and mechanism.

## Methods

We utilized data collected from the Danish National Birth Cohort (DNBC), which is a longitudinal population based cohort of pregnant women and their offspring established during 1996–2002. During these years women were contacted to take part in the study by physicians providing their primary care during pregnancy. Approximately half of all general practitioners in Denmark participated in the study; and approximately 60% of women who were invited participated. Additional information on study design and data collection methods for the DNBC are described elsewhere [5]. Information was collected twice during pregnancy using computer assisted telephone interviews, at gestational age 12 and 30 weeks; and again when the children reached 6 and 18 months of age. All Regional Ethics Committee in Denmark

1  
2  
3 approved the establishment of the cohort and this study was further approved by the Danish Data  
4  
5 Protection Agency and UCLA Office for Protection of Research Subjects.  
6  
7

8  
9 To obtain information regarding birth outcomes, data for each woman were linked through her personal  
10  
11 civil registration number to the Danish National Birth Registry and the Danish National Patient Registry  
12  
13 for the entire pregnancy period. The Danish National Birth Registry has collected data since 1968 for the  
14  
15 primary purpose of monitoring the health of newborns and the quality of antenatal care, and has been  
16  
17 increasingly used for research [6]. The gestational age at birth and birth weight was obtained from the  
18  
19 Birth Register. Small for gestational age (SGA) was defined as a weight below the 10<sup>th</sup> percentile for  
20  
21 gestational age, grouped by week, among children born in the DNBC.  
22  
23

24  
25 Information regarding injuries sustained during pregnancy was obtained from the Danish National Patient  
26  
27 Registry, which contains data on all hospital stays and outpatient visits for the duration of each woman's  
28  
29 pregnancy. For each admission or visit, the patient registry collects information on the primary discharge  
30  
31 diagnosis (the discharge diagnosis that best describes the condition leading to the admission or outpatient  
32  
33 visit and that is the primary reason for the prescribed and completed course of tests and treatments) and up  
34  
35 to 20 subsidiary diagnoses. It also collects information on external cause of injury, including the mode,  
36  
37 location, and mechanism causing the injury. Data were extracted for the entire study period (1996-2002)  
38  
39 with the use of *International Classification of Diseases, 10th Revision* (ICD Website, 2007) [6] and the  
40  
41 second edition of the Nordic Medico-Statistical Committee's (NOMESCO) Classification of External  
42  
43 Causes of Injuries (NCECI) [8].  
44  
45  
46  
47  
48

49 We identified 90,452 women who completed the first interview. All injuries were classified by the body  
50  
51 location and mechanism causing the injury; transportation injuries were further described by mode of  
52  
53 transportation. Women were categorized as injured if they sustained an injury at any point during  
54  
55 pregnancy, regardless of mode, body region, and mechanism causing the injury; and uninjured otherwise.  
56  
57  
58  
59  
60

1  
2  
3 To determine if injured women were more likely to deliver preterm (<34 weeks, 34-36 weeks,  $\geq 37$   
4 weeks), low birth weight (<1500 grams, 1500-2499 grams,  $\geq 2500$  grams), stillbirth or have a spontaneous  
5 abortion, we estimated Cox proportional hazard ratios (HRs) using PROC PHREG in SAS Statistical  
6 Software, to allow for a time-to-event analysis. These models were adjusted for maternal smoking and  
7 drinking during pregnancy, household socioeconomic status, eclampsia/pre-eclampsia or gestational  
8 diabetes status during pregnancy and maternal age at birth; estimates for preterm birth were also adjusted  
9 for prior history of preterm birth. To determine if injured women were more likely to deliver SGA infants  
10 or infants with an APGAR score of <3 or between 4-6 using  $\geq 7$  as a baseline, we generated odds ratios  
11 (ORs) using PROC GENMOD in SAS statistical software. Approximately 8 percent of women in the  
12 study participated more than once. Repeated subject statement was entered into each statistical model. To  
13 assess severity of injuries sustained we compared women who sustained head, and head and neck injuries  
14 to uninjured women.

## 30 Results

31  
32 In our cohort of 90,452 pregnant women, 3,561 (3.9%) received medical treatment for an injury during  
33 their pregnancy. Socio demographic characteristics of all women in the cohort are presented in table 1.  
34 Results have been stratified by presence/absence of injury. Injured women were younger, smoked  
35 cigarettes more often and had lower household socioeconomic status. Maternal age, parity, smoking  
36 status, alcohol consumption, household socio-economic status and partner cohabitation status were  
37 statistically different in the injured versus non-injured groups (p-values less than 0.05 were calculated by  
38 chi-square test). Injury characteristics such as mode of injury, activity engaged in while sustaining injury,  
39 mechanism causing injury and body region of injury are presented in table 2. Approximately one third of  
40 the injuries were due to falls and took place during a leisure activity. Less than one fifth of the injuries  
41 were related to transportation. Hazard and odds ratios are presented in table 3. We found that injured  
42 pregnant women were slightly more likely to deliver infants that were stillborn or have pregnancies that  
43 were terminated by spontaneous abortion. We did not detect an adverse effect between injuries sustained  
44  
45  
46  
47  
48  
49  
50  
51  
52  
53  
54  
55  
56  
57  
58  
59  
60

1  
2  
3 during pregnancy and delivery of preterm, low birth weight or small for gestational age infants, or infants  
4  
5 with an APGAR score of less than 7.  
6  
7

## 8 9 **Discussion**

10 Our study shows that injuries occurring in an unselected Danish population of pregnant women do not  
11  
12 adversely affect birth weight, gestational age, APGAR scores, or SGA status but are adversely associated  
13  
14 with stillbirth and spontaneous abortion. Adverse pregnancy outcomes resulting from maternal injury  
15  
16 have been documented in other studies [9-25]. Severely injured pregnant women are more likely to have  
17  
18 preterm labor, placental abruption, cesarean-section, uterine rupture, low birth-weight, and their infants  
19  
20 are more likely to result in pre-term delivery and suffer from fetal distress, asphyxia, respiratory distress  
21  
22 syndrome and circum to fetal, neonatal and infant death compared to their uninjured counterparts [14].  
23  
24 Minor trauma has also been recognized as contributor to poor fetal outcomes. Fischer et al. found minor  
25  
26 injuries were associated with fetal demise, preterm birth and low birth weight [26]. We were not able to  
27  
28 corroborate these findings, possibly due to the nature of the health care system in Denmark, where the  
29  
30 first point of medical intervention is often with a primary care physician. It is possible that we missed  
31  
32 detection of injuries seen by midwives or the primary care physician, which restrict our effect estimates to  
33  
34 more severe outcomes.  
35  
36  
37  
38  
39  
40  
41

42 Our results may not apply to other healthcare settings. This study is based on a Danish population which  
43  
44 has low fertility and where most women take part in the work force. Furthermore, duration of pregnancy  
45  
46 leave is generous, compensated, and accesses to health care services are covered at no cost to patients. In  
47  
48 this study we were able to assess socio-demographic characteristics of this population and our data shows  
49  
50 that injured women were slightly younger than their non-injured counterparts. Trends in household socio-  
51  
52 economic status also seemed to differ slightly; there were fewer injured women with higher-grade  
53  
54 professional household status and more injured women with unskilled work status, compared to their non-  
55  
56 injured counterparts. Injured women were also slightly more likely to smoke cigarettes and consume  
57  
58  
59  
60

1  
2  
3 three or more alcoholic drinks per week. The high prevalence of binge drinking in the DNBC occurred  
4 often at very early stage of pregnancy, when pregnancy status may be uncertain or unknown to the  
5 mother. Nine out of ten traumatic injuries during pregnancy are minor; however, 60-70% of fetal losses  
6 during pregnancy have been reported as a result of minor injuries [17]. In this study we only have data on  
7 late spontaneous abortions, and if injured fetuses are aborted early it may explain why we detect limited  
8 associations among newborns.  
9

10  
11 Future studies should focus on long term infant outcomes that extend beyond the perinatal period, to fully  
12 assess the effects of maternal injury. Additional research evaluating maternal characteristics that may  
13 influence injury severity and proneness may aid in maternal injury prevention. At present it is reassuring  
14 that even women hospitalized for an injury during pregnancy will in only a few cases have an excess risk  
15 of having an adverse pregnancy outcome.  
16  
17  
18  
19  
20  
21  
22  
23  
24  
25  
26  
27  
28

### 29 **Author Contributions**

30  
31 JV, JO, and PH contributed to conception and design of the paper. JO contributed to acquisition of data.  
32  
33 JV and PH contributed to analysis of the data. JV, JO and PH contributed to interpretation of data. JV  
34 wrote the original paper draft; JO and PH contributed to revisions of the paper. JV, JO and PH approved  
35 the final version of the paper to be published.  
36  
37  
38  
39  
40  
41

### 42 **Data Sharing Statement**

43  
44 There is no additional data available.  
45  
46  
47  
48

### 49 **Funding Statement**

50  
51 This research received no specific grant from any funding agency in the public, commercial or not-for-  
52 profit sectors.  
53  
54  
55  
56  
57

### 58 **Competing Interests Statement**

1  
2  
3  
4  
5  
6  
7  
8  
9  
10  
11  
12  
13  
14  
15  
16  
17  
18  
19  
20  
21  
22  
23  
24  
25  
26  
27  
28  
29  
30  
31  
32  
33  
34  
35  
36  
37  
38  
39  
40  
41  
42  
43  
44  
45  
46  
47  
48  
49  
50  
51  
52  
53  
54  
55  
56  
57  
58  
59  
60

The authors of this paper declare no competing interests.

For peer review only



**Table 1: Demographic statistics on study population stratified by injury status and department of hospital admittance**

|                                                  | Total cohort |      | Non-Injured<br>n=86891 |      | Injured <sup>±</sup><br>n=3561 |      | Head or Neck Injuries<br>n=534 |       |
|--------------------------------------------------|--------------|------|------------------------|------|--------------------------------|------|--------------------------------|-------|
| Characteristics                                  | N            | (%)  | N                      | (%)  | N                              | (%)  | N                              | (%)   |
| <b>Maternal age at delivery</b>                  |              |      |                        |      |                                |      |                                |       |
| <25 yr                                           | 8695         | 9.6  | 8142                   | 9.4  | 553                            | 15.5 | 86                             | 16.1  |
| 25-29 yr                                         | 34726        | 38.4 | 33341                  | 38.4 | 1385                           | 38.9 | 194                            | 36.3  |
| 30-34 yr                                         | 33537        | 37.1 | 32392                  | 37.3 | 1145                           | 32.2 | 180                            | 33.7  |
| 35-39 yr                                         | 12006        | 13.3 | 11594                  | 13.3 | 412                            | 11.6 | 63                             | 11.8  |
| ≥40 yr                                           | 1488         | 1.6  | 1422                   | 1.6  | 66                             | 1.9  | 11                             | 2.1   |
| <b>Gestational age at delivery (weeks)</b>       |              |      |                        |      |                                |      |                                |       |
| < 34                                             | 1227         | 1.5  | 1177                   | 1.4  | 50                             | 1.5  | 9                              | 1.8   |
| 34-36                                            | 2756         | 3.2  | 2629                   | 3.2  | 127                            | 3.8  | 20                             | 4.0   |
| ≥37                                              | 82642        | 95.3 | 79454                  | 95.4 | 3188                           | 94.7 | 475                            | 94.2  |
| <b>Birth weight (grams)</b>                      |              |      |                        |      |                                |      |                                |       |
| < 1500                                           | 538          | 0.6  | 538                    | 0.6  | 18                             | 0.5  | 4                              | 0.8   |
| 1500-2499                                        | 2074         | 2.5  | 2074                   | 2.5  | 101                            | 3.0  | 15                             | 3.0   |
| ≥2500                                            | 80451        | 96.9 | 80451                  | 96.9 | 3238                           | 96.5 | 484                            | 96.2  |
| <b>Sex of child</b>                              |              |      |                        |      |                                |      |                                |       |
| Female                                           | 42284        | 48.8 | 40696                  | 48.8 | 1588                           | 47.2 | 236                            | 46.8  |
| Male                                             | 44435        | 51.2 | 42656                  | 51.2 | 1779                           | 52.8 | 268                            | 53.2  |
| <b>Parity</b>                                    |              |      |                        |      |                                |      |                                |       |
| 1                                                | 39224        | 46.3 | 37569                  | 47.2 | 1655                           | 50.7 | 238                            | 48.1  |
| 2                                                | 31604        | 37.3 | 30463                  | 38.3 | 1141                           | 35.0 | 192                            | 38.8  |
| 3+                                               | 13859        | 16.4 | 11593                  | 14.6 | 466                            | 14.3 | 65                             | 13.1  |
| <b>Smoking status</b>                            |              |      |                        |      |                                |      |                                |       |
| None                                             | 64589        | 73.4 | 62299                  | 73.7 | 2290                           | 66.7 | 344                            | 67.3  |
| Stopped during pregnancy                         | 12530        | 14.2 | 11923                  | 14.1 | 607                            | 17.7 | 91                             | 17.8  |
| 1-10                                             | 10725        | 12.2 | 10193                  | 12.1 | 532                            | 15.5 | 76                             | 14.9  |
| ≥10                                              | 120          | 0.1  | 117                    | 0.1  | 3                              | 0.1  | 0                              | 0     |
| <b>Average alcohol consumption (drinks/week)</b> |              |      |                        |      |                                |      |                                |       |
| None                                             | 41325        | 64.9 | 39642                  | 64.7 | 1683                           | 68.8 | 270                            | 34.3  |
| 1                                                | 10480        | 16.5 | 10124                  | 16.5 | 356                            | 14.5 | 466                            | 59.2  |
| 2                                                | 6872         | 10.8 | 6649                   | 10.9 | 223                            | 9.1  | 29                             | 3.7   |
| 3                                                | 2554         | 4.0  | 2462                   | 4.0  | 92                             | 3.8  | 7                              | 0.9   |
| 4+                                               | 2442         | 3.8  | 2351                   | 3.8  | 91                             | 3.7  | 15                             | 1.977 |
| ≥5 at one time                                   | 26779        | 30.8 | 25663                  | 29.5 | 1116                           | 31.3 | 167                            | 31.2  |

|                                        |       |      |       |      |      |      |     |      |
|----------------------------------------|-------|------|-------|------|------|------|-----|------|
| <b>Household socio-economic status</b> |       |      |       |      |      |      |     |      |
| Higher-grade professionals             | 20713 | 23.5 | 19989 | 23.6 | 724  | 21.1 | 126 | 24.7 |
| Middle-grade professionals             | 27304 | 31.0 | 26326 | 31.1 | 978  | 28.5 | 135 | 26.4 |
| Skilled work                           | 24577 | 27.9 | 23587 | 27.9 | 990  | 28.8 | 143 | 28.0 |
| Unskilled work                         | 12408 | 14.1 | 11804 | 14.0 | 604  | 17.6 | 83  | 16.2 |
| Student                                | 2075  | 2.4  | 1991  | 2.4  | 84   | 2.4  | 11  | 2.2  |
| Unemployed > 1 yr                      | 683   | 0.8  | 641   | 0.8  | 42   | 1.2  | 9   | 1.8  |
| Unclassified                           | 204   | 0.2  | 194   | 0.2  | 10   | 0.3  | 4   | 0.8  |
| <b>Partner cohabitation status</b>     |       |      |       |      |      |      |     |      |
| Cohabits                               | 66859 | 99.0 | 64359 | 98.1 | 2500 | 98.1 | 353 | 98.1 |
| Does not cohabit                       | 687   | 1.0  | 639   | 1.9  | 48   | 1.95 | 7   | 1.95 |
| <b>Place of delivery</b>               |       |      |       |      |      |      |     |      |
| Urban*                                 | 48570 | 53.7 | 46681 | 53.0 | 1889 | 53.0 | 274 | 51.3 |
| Rural                                  | 41882 | 46.3 | 40210 | 47.0 | 1672 | 47.0 | 260 | 48.7 |
| <b>Outcome</b>                         |       |      |       |      |      |      |     |      |
| Low birth weight (<2500 grams)         | 2731  | 3.0  | 2612  | 3.0  | 119  | 3.8  | 19  | 3.6  |
| Preterm birth (<37 weeks)              | 3886  | 4.3  | 3715  | 4.3  | 171  | 4.8  | 29  | 5.4  |
| Small for gestational age (SGA)        | 8528  | 9.4  | 8162  | 9.4  | 336  | 9.4  | 59  | 11.0 |
| Spontaneous abortion                   | 3355  | 3.7  | 3181  | 3.7  | 174  | 4.9  | 27  | 5.1  |
| Stillbirth                             | 288   | 0.3  | 271   | 0.3  | 17   | 0.5  | 3   | 0.6  |
| Apgar Score <7                         | 605   | 0.7  | 586   | 0.7  | 19   | 0.5  | 1   | 0.2  |

\*Urban residence include Aarhus, Gentofte, Frederiksberg, Odense, Aalborg

\*\*Missing values: gestational age=184, birth weight=389, sex of child=90, parity=5765, smoking=1155, cohabitation status=22,920

± P-values less than 0.05 stratified by injury status and calculated by chi-square test: maternal age, parity, maternal smoking, alcohol consumption, household socio-economic status and partner cohabitation status

**Table 2: Description of Injuries**

| <i>Mode of Injury</i>                                       | <b>N</b> | <b>%</b> |
|-------------------------------------------------------------|----------|----------|
| Knock, blow due to bodily contact with object/animal/person | 975      | 27       |
| Crushing/cut/sting                                          | 621      | 17       |
| Knock, blow caused by fall on the same level                | 519      | 15       |
| Knock, blow caused by fall on stairway/lower level          | 381      | 11       |
| Acute overload of the whole or part of the body             | 331      | 9        |
| Foreign object                                              | 115      | 3        |
| Thermal/electrical impact or radiation                      | 55       | 2        |
| Chemical influence                                          | 28       | 1        |
| Other/unspecified cause of injury                           | 74       | 2        |
| <i>Activity during injury</i>                               |          |          |
| Play, hobby and other leisure activity                      | 913      | 26       |
| Work                                                        | 545      | 15       |
| Vital activity*                                             | 300      | 8        |
| Sport, exercise                                             | 185      | 5        |
| Unpaid work                                                 | 161      | 5        |
| Other activity/Unspecified                                  | 765      | 21       |
| <i>Description of transportation injuries</i>               |          |          |
| Car                                                         | 351      | 66       |
| Bicycle                                                     | 131      | 25       |
| Moped/Motorbike/scooter                                     | 21       | 4        |
| On foot                                                     | 12       | 2        |
| Delivery van/truck/bus or other                             | 10       | 2        |
| Other/Unspecified transportation                            | 7        | 1        |

\*includes sleep, rest, taking meals and personal hygiene

**Table 3: Odds and Hazard Ratios, and 95% Confidence Limits for adverse birth outcomes following maternal exposure to injuries during pregnancy\***

| Outcome                                |             | Non-Injured Women N=86891 | Injured Women N=3561 | Women with head or neck injuries N=534 | Women with head injuries N=312 |
|----------------------------------------|-------------|---------------------------|----------------------|----------------------------------------|--------------------------------|
| Small for gestational age <sup>†</sup> |             | reference                 | 1.06 (0.95, 1.18)    | 1.15 (0.88, 1.52)                      | 1.18 (0.84, 1.64)              |
| Spontaneous abortion <sup>‡</sup>      |             | reference                 | 1.18 (0.99, 1.40)    | 1.02 (0.68, 1.53)                      | 0.93 (0.60, 1.44)              |
| Stillbirth <sup>‡</sup>                |             | reference                 | 1.67 (1.01, 2.77)    | 2.08 (0.67, 6.50)                      | 3.17 (1.02, 9.88)              |
| Low birth weight (grams) <sup>†</sup>  | <1500       | -                         | 0.76 (0.48, 1.24)    | 0.89 (0.22, 3.57)                      | 0.83 (0.12, 5.95)              |
|                                        | 1500-2499   | -                         | 1.05 (0.90, 1.23)    | 1.12 (0.67, 1.89)                      | 1.09 (0.70, 1.71)              |
|                                        | ≥2500       | -                         | reference            | reference                              | reference                      |
| Preterm birth <sup>‡</sup>             | <34 weeks   | -                         | 0.77 (0.39, 1.48)    | 0.89 (0.22, 3.57)                      | 0.92 (0.13, 6.60)              |
|                                        | 34-36 weeks | -                         | 1.05 (0.90, 1.23)    | 0.99 (0.68, 1.45)                      | 1.35 (0.86, 2.12)              |
|                                        | ≥37 weeks   | -                         | reference            | reference                              | reference                      |
| APGAR Score <sup>†</sup>               | ≤3          | -                         | 1.15 (0.93, 1.40)    | not enough data                        | not enough data                |
|                                        | 4-6         | -                         | 0.78 (0.47, 1.31)    | not enough data                        | not enough data                |
|                                        | 7-10        | -                         | reference            | reference                              | reference                      |

\*All models were adjusted for eclampsia/pre-eclampsia and gestational diabetes status during pregnancy, maternal smoking and drinking during pregnancy, household socioeconomic status, and maternal age at birth, preterm birth model includes all aforementioned variables and history of preterm birth; Non-Injured women were used as the comparison group. <sup>†</sup> Odds Ratios, <sup>‡</sup> Hazard Ratios

## REFERENCES:

1. Chames MC, Pearlman MD. Trauma during pregnancy: outcomes and clinical management. *Clin Obstet Gynecol.* 2008;51(2):398-408.
2. Oxford CM, Ludmir J. Trauma in pregnancy. *Clin Obstet Gynecol.* 2009;52(4):611-29.
3. Mirza FG, Devine PC, Gaddipati S. Trauma in pregnancy: a systematic approach. *Am J Perinatol.* 2010;27(7):579-86.
4. Melamed N, Aviram A, Silver M, Peled Y, Wiznitzer A, Glezerman M, Yogev Y. Pregnancy course and outcome following blunt trauma. *J Matern Fetal Neonatal Med.* 2012 Feb 1. [Epub ahead of print]
5. Olsen J, Melbye M, Olsen SF, Sorensen TIA, Aaby P, et. Al. The Danish National Birth Cohort – its background, structure and aim. *Scand J Public Health.* 2001;29:300-307.
6. Virk J, Zhang J, Olsen J. Medical abortion and the risk of subsequent pregnancy outcomes. *N Engl J Med.* 2007;357(7):648-53.
7. International Classification of Diseases (ICD) online. Geneva: World Health Organization. (Accessed July 20, 2007, at <http://www.who.int/classifications/icd/en/>.)
8. Nordic Medico-Statistical Committee's (NOMESCO) Classification of External Causes of Injuries (NCECI).
9. Schiff MA, Holt VL, Daling JR. Maternal and infant outcomes after injury during pregnancy in Washington State from 1989 to 1997. *J Trauma.* 2002;53(5):939-45.
10. Ikossi DG, Lazar AA, Morabito D, et al. Profile of mothers at risk: an analysis of injury and pregnancy loss in 1,195 trauma patients. *J Am Coll Surg.* 2005;200(1):49-56. Erratum in: *J Am Coll Surg.* 2005;200(3):482.
11. Weiss HB, Lawrence B, Miller T. Prevalence and risk of hospitalized pregnant occupants in car crashes. *Annu Proc Assoc Adv Automot Med.* 2002;46:355-66.
12. Weiss HB, Strotmeyer S. Characteristics of pregnant women in motor vehicle crashes. *Inj Prev.* 2002;8(3):207-10.

13. Schiff MA, Holt VL. Pregnancy outcomes following hospitalization for motor vehicle crashes in Washington State from 1989 to 2001. *Am J Epidemiol.* 2005;161(6):503-10.
14. El-Kady D, Gilbert WM, Anderson J, et al. Trauma during pregnancy: an analysis of maternal and fetal outcomes in a large population. *Am J Obstet Gynecol.* 2004;190(6):1661-8.
15. Hitosugi M, Motozawa Y, Kido M, et al. Traffic injuries of the pregnant women and fetal or neonatal outcomes. *Forensic Sci Int.* 2006;159(1):51-4.
16. Hyde LK, Cook LJ, Olson LM, et al. Effect of motor vehicle crashes on adverse fetal outcomes. *Obstet Gynecol.* 2003;102(2):279-86.
17. El Kady. Perinatal outcomes of traumatic injuries during pregnancy. *Clin Obstet Gynecol.* 2007;50(3):582-91.
18. El Kady D, Gilbert WM, Xing G, et al. Maternal and neonatal outcomes of assaults during pregnancy. *Obstet Gynecol.* 2005;105(2):357-63.
19. El Kady D, Gilbert WM, Xing G, et al. Association of maternal fractures with adverse perinatal outcomes. *Am J Obstet Gynecol.* 2006;195(3):711-6.
20. Gandhi SG, Gilbert WM, McElvy SS, et al. Maternal and neonatal outcomes after attempted suicide. *Obstet Gynecol.* 2006;107(5):984-90.
21. Lipsky S, Holt VL, Easterling TR, et al. Police-reported intimate partner violence during pregnancy and the risk of antenatal hospitalization. *Matern Child Health J.* 2004;8(2):55-63.
22. Patterson RM. Trauma in pregnancy. *Clin Obstet Gynecol.* 1984;27:32-38.
23. Shah KH, Simons RK, Holbrook T, et al. Trauma in pregnancy: maternal and fetal outcomes. *J Trauma.* 1998;45(1):83-6.
24. Weiss HB, Songer TJ, Fabio A. Fetal deaths related to maternal injury. *JAMA.* 2001;286(15):1863-8.
25. Weiss HB, Sauber-Schatz EK, Cook LJ. The epidemiology of pregnancy-associated emergency department injury visits and their impact on birth outcomes. *Accid Anal Prev.* 2008 May;40(3):1088-95.

- 1  
2  
3  
4  
5  
6 26. Fischer PE, Zarzaur BL, Fabian TC, Magnotti LJ, Croce MA. Minor Trauma is an  
7  
8 Unrecognized Contributor to Poor Fetal Outcomes: A Population-Based Study of 78,552  
9  
10 Pregnancies. J Trauma. 2011;71(1):90-93.  
11  
12  
13  
14  
15  
16  
17  
18  
19  
20  
21  
22  
23  
24  
25  
26  
27  
28  
29  
30  
31  
32  
33  
34  
35  
36  
37  
38  
39  
40  
41  
42  
43  
44  
45  
46  
47  
48  
49  
50  
51  
52  
53  
54  
55  
56  
57  
58  
59  
60

1  
2  
3  
4  
5  
6  
7  
8  
9  
10  
11  
12  
13  
14  
15  
16  
17  
18  
19  
20  
21  
22  
23  
24  
25  
26  
27  
28  
29  
30  
31  
32  
33  
34  
35  
36  
37  
38  
39  
40  
41  
42  
43  
44  
45  
46  
47  
48  
49  
50  
51  
52  
53  
54  
55  
56  
57  
58  
59  
60

For peer review only
